# Supplementary material for: Bio-optical characterization of subsurface chlorophyll maxima in the Mediterranean Sea from a Biogeochemical-Argo float database
Source: Copernicus journal article supplement (doi:10.5194/bg-2018-367), 2018-09-03
Supplement: Supplementary file [file bg-2018-367-AC3-supplement.pdf]

# Bio-optical characterization of subsurface chlorophyll maxima in the Mediterranean Sea from a Biogeochemical-Argo float database

Marie Barbioux<sup>1</sup>, Julia Uitz<sup>1</sup>, Bernard Gentili<sup>1</sup>, Orens Pasqueron de Fommervault<sup>2</sup>, Alexandre Mignot<sup>3</sup>, Antoine Poteau<sup>1</sup>, Catherine Schmechtig<sup>4</sup>, Vincent Taillandier<sup>1</sup>, Edouard Leymarie<sup>1</sup>, Christophe Penker'h<sup>1</sup>, Fabrizio D'Ortenzio<sup>1</sup>, Hervé Claustre<sup>1</sup> & Annick Bricaud<sup>1</sup>

<sup>1</sup>CNRS and Sorbonne Université, Laboratoire d'Océanographie de Villefranche, LOV, F-06230 Villefranche-sur-mer, France

<sup>2</sup>Alseamar-alcen company, 9 Europarc Sainte Victoire, 13590 Meyreuil, France

<sup>3</sup>Mercator Océan, 31520 Ramonville Saint Agne

<sup>4</sup>OSU Ecce Terra, UMS 3455, CNRS and Sorbonne Université, Paris 6, 4 place Jussieu 75252 Paris cedex 05, France

Correspondence to: Marie Barbioux ([marie.barbioux@obs-vlfr.fr](mailto:marie.barbioux@obs-vlfr.fr))

## ABSTRACT

As commonly observed in oligotrophic stratified waters, a Subsurface (or Deep) Chlorophyll Maximum (SCM) frequently characterizes the vertical distribution of phytoplankton chlorophyll in the Mediterranean Sea. Occurring far from the surface layer “seen” by ocean color satellites, SCMs are difficult to observe with adequate spatio-temporal resolution and their biogeochemical impact remains unknown. BioGeochemical-Argo (BGC-Argo) profiling floats represent appropriate tools for studying the dynamics of SCMs. Based on data collected from 36 BGC-Argo floats deployed in the Mediterranean Sea, our study aims to address two main questions: (1) What are the different types of SCMs in Mediterranean Sea? (2) Which environmental factors control their occurrence and dynamics? First, we analyzed the seasonal and regional variations of the chlorophyll concentration ( $Chl_a$ ), particulate backscattering coefficient ( $b_{bp}$ ), a proxy of the Particulate Organic Carbon (POC), and environmental parameters (PAR and nitrates) within the SCM layer over the Mediterranean basin. The vertical profiles of  $Chl_a$  and  $b_{bp}$  were then statistically classified, and the seasonal occurrence of each of the different types of SCMs quantified. Finally, a case study was performed on two contrasted regions and the environmental conditions at depth were further investigated to understand the main controls on the SCMs. In the Eastern Basin, SCMs result, at a first order, from photoacclimation process. Conversely, SCMs in the Western Basin reflect a biomass increase at depth benefiting from both light and nitrate resources. Our results also suggest that a variety of intermediate types of SCMs are encountered between these two end-member situations.

## 34 **1 INTRODUCTION**

35 The vertical distribution of phytoplankton in the open ocean is often characterized by the  
36 occurrence of high chlorophyll a concentration (Chla) beneath the mixed layer (Cullen and  
37 Eppley, 1981; Fasham et al., 1985; Raimbault et al., 1993; Letelier et al., 2004; Tripathy et  
38 al., 2015). This phenomenon is commonly referred to as Deep Chlorophyll Maximum (DCM)  
39 or Subsurface Chlorophyll Maximum (SCM). Although it always happens below the surface  
40 layer (approximately below the first 20 meters), it does not necessarily settle very deep in the  
41 water column, thus making the notation DCM sometimes inappropriate. Hence, in the  
42 following, we will use the notation SCM. Commonly observed at depth in oligotrophic  
43 stratified regions (Anderson, 1969; Cullen, 1982; Furuya, 1990; Mignot et al., 2014), SCMs  
44 are also known to occur below the mixed layer in temperate- and high-latitude environments  
45 (Parslow et al., 2001; Uitz et al., 2009; Ardyna et al., 2013; Arrigo et al., 2011). The  
46 formation of a subsurface maximum of Chla in these different ecosystems results from  
47 various underlying mechanisms leading to different types of SCMs. In stratified waters,  
48 SCMs often result from photoacclimation of the phytoplankton organisms, which induces an  
49 increase in the intracellular Chla in response to low light conditions (Kiefer et al., 1976; Winn  
50 et al., 1995; Fennel and Boss, 2003; Dubinsky and Stambler, 2009). However SCMs resulting  
51 from an actual increase in phytoplankton carbon biomass have also been reported in such  
52 ecosystems (Beckmann and Hense, 2007; Crombet et al, 2011; Mignot et al., 2014). In high-  
53 latitude regions with well-mixed surface waters, SCMs have been shown to result from the  
54 accumulation of particles sinking from the mixed layer (Quéguiner et al., 1997; Parslow et al,  
55 2001), photophysiological acclimation of algal cells (Mikaelyan and Belyaeva, 1995) or  
56 phytoplankton growth at the depth of the nutricline (Holm-Hansen and Hewes, 2004; Tripathy  
57 et al, 2015). Hence, regional or local studies have highlighted underlying processes indicating  
58 that, under certain conditions, SCMs could contribute to carbon production and export, and

59 thus potentially have an important biogeochemical role. However, we have limited knowledge  
60 of their biogeochemical significance at large spatial and temporal scales. Their contribution to  
61 the depth-integrated primary production has been assessed for a limited number of regions  
62 and remains largely unknown. It has been reported to be underestimated from 40 to 75% in  
63 the Arctic Ocean (Ardyna et al., 2013; Hill et al., 2013), to more than 40% in the oligotrophic  
64 Atlantic (Perez et al., 2006), 40-50% in the Celtic Sea (Hickman et al., 2012) and about 58%  
65 in the North Sea (Weston et al., 2005). The biogeochemical contribution of the SCMs to the  
66 global ocean is also particularly hard to assess at large spatio-temporal scales, especially  
67 because SCMs settle at a depth usually far from the surface layer “seen” by ocean color  
68 satellites. Remotely sensed estimates are restricted to the upper layer of the water column that  
69 represent only one fifth of the euphotic layer where phytoplankton photosynthesis takes place  
70 (Gordon and McCluney, 1975). The exact biogeochemical role of SCMs, thus, needs to be  
71 further explored.

72         The Mediterranean Sea is considered as an oligotrophic province where the vertical  
73 distribution of phytoplankton is, seasonally or permanently, characterized by the occurrence  
74 of a SCM (Kimor et al., 1987; Estrada et al., 1993; Videau et al., 1994; Christaki et al., 2001;  
75 Siokou-Frangou et al., 2010; Lavigne et al., 2015). It is also a low-nutrient concentration  
76 basin, one of the largest nutrient-depleted areas of the global ocean and it is characterized by a  
77 west-to-east gradient in both nutrients and chlorophyll *a* concentration (Dugdale and  
78 Wilkerson, 1988; Bethoux et al., 1992; Antoine et al., 1995; Bosc et al., 2004; D’Ortenzio and  
79 Ribera d’Alcalà, 2009). While the Eastern Basin is defined as oligotrophic (Krom et al., 1991;  
80 Ignatiades et al., 2002; Lavigne et al., 2015), the Western Basin is more productive and  
81 behaves as a temperate system (Morel and André, 1991; Marty et al., 2002; Mayot et al.,  
82 2017b). Hence, this “miniature ocean” presents SCMs that may be encountered in both  
83 seasonally stratified environments and permanently stratified waters of the global ocean. This,

84 coupled with an intensive effort of biogeochemical observations in this region, makes the  
85 Mediterranean Sea an ideal region for studying SCMs.

86 The biogeochemical and bio-optical community recently developed autonomous  
87 profiling floats that collect *in situ* vertical profiles of biogeochemical properties such as the  
88 chlorophyll *a* fluorescence (*i.e.* a proxy of the chlorophyll *a* concentration (Chl*a*)) and the  
89 particulate backscattering coefficient ( $b_{bp}$ ) (*i.e.* a proxy of the Particulate Organic Carbon  
90 (POC)). Physical-chemical properties such as nitrate concentration ( $[NO_3^-]$ ) or the  
91 Photosynthetically Available Radiation (PAR), essential to understand the functioning of  
92 SCMs, are also measured simultaneously (Johnson et al., 2009; Claustre et al., 2010; Johnson  
93 and Claustre, 2016). Thirty-six BioGeochemical-Argo (BGC-Argo) have been deployed in the  
94 Mediterranean Sea from 2012 to 2017, providing a database of 4050 *in situ* multi-variable  
95 profiles. This extensive database gives us the unique opportunity to enhance our  
96 comprehension of the vertical distribution and seasonal variability of the phytoplankton  
97 biomass in the subsurface layer of the Mediterranean Sea and expand our understanding of the  
98 mechanisms involved in the occurrence of SCMs. Our study seeks to address two main  
99 questions: (1) What are the different types of SCMs in Mediterranean Sea?; and (2) Which  
100 environmental factors control the occurrence and dynamics of the different types of SCMs in  
101 this region? To address these questions, three complementary approaches were used. First,  
102 based on a climatological approach, we analyzed the spatial and seasonal variability of  
103 biogeochemical properties (*i.e.* Chl*a* and  $b_{bp}$ ) and environmental conditions at the SCM level.  
104 This should lead to the identification of the main mechanisms controlling SCMs in different  
105 regions of the Med Sea. Second, using a statistical method, we classified the vertical profiles  
106 of Chl*a* and  $b_{bp}$  seasonally encountered in the various regions of the Med. This approach  
107 allowed us to quantify the frequency of occurrence of distinct types of SCMs in these  
108 different regions. Finally, using two specific BGC-Argo floats deployed in the Gulf of Lions

109 and the Levantine Sea, we conducted a case study of two contrasted regimes and investigate  
110 the environmental conditions that control the occurrence of SCMs in each regime.

## 111 **2 DATA AND METHODS**

### 112 **2.1 The BGC-Argo profiling float database**

113 Thirty-six BGC-Argo profiling floats were deployed in the Mediterranean Sea in 5  
114 geographic areas, *i.e.* the Northwestern (NW) and Southwestern (SW) regions, the Tyrrhenian  
115 (TYR), Ionian (ION) and Levantine (LEV) Seas. Our study was based on the analysis of a  
116 database comprising 4050 multivariable vertical profiles, corresponding to upward casts  
117 collected between November 26, 2012 and September 27, 2017 (Table 1 and Figure 1). The  
118 “PROVOR CTS-4” (NKE Marine Electronics, Inc.) is a profiling autonomous platform that  
119 has been specifically designed in the frame of the remOcean and NAOS projects. The  
120 physical variables (depth, temperature and salinity) were acquired by a SBE 41 CTD (Sea-  
121 Bird Scientific Inc.). Two optical packages, the so-called remA and remB, were developed to  
122 be specifically implemented on profiling floats. The remA is composed of an OCR-504  
123 (SAntlantic, Inc.), a multispectral radiometer that measures the Photosynthetically Available  
124 Radiation (PAR) and the downwelling irradiance at 380, 410 and 490 nm. The remA also  
125 includes an ECO3 sensor (Combined Three Channel Sensors; WET Labs, Inc.) measuring the  
126 fluorescence of the chlorophyll *a* and the Colored Dissolved Organic Matter (CDOM) at  
127 excitation/emission wavelengths of 470/695 nm and 370/460 nm, respectively, and the  
128 angular scattering coefficient of particles ( $\beta(\theta, \lambda)$ ) at 700 nm and at an angle of 124°. Finally,  
129 15 floats were also equipped with a nitrate ( $\text{NO}_3^-$ ) (Deep SUNA, Sea-Bird Scientific, Inc.)  
130 or/and an oxygen ( $\text{O}_2$ ) sensor (optode 4330, Aanderaa, Inc.). Depending on the scientific  
131 objectives of the different projects, the measurements were collected during upward casts  
132 programmed every 1, 2, 3, 5, or 10 days. All casts started from a parking depth at 1000 m at a

133 time that was sufficient for surfacing around local noon. The vertical resolution of data  
134 acquisition was 10 m between 1000 m and 250 m, 1 m between 250 m and 10 m, and 0.2 m  
135 between 10 m and the surface. Each time the floats surfaced, the raw data were transmitted to  
136 land through Iridium two-way communication.

## 137 **2.2 Retrieval of key biogeochemical variables from optical measurements**

138 For each bio-optical parameter, raw counts were converted into the desired quantities  
139 according to technical specifications and calibration coefficients provided by the  
140 manufacturer. These quantities were transformed into chlorophyll *a* concentration (*Chl<sub>a</sub>*) and  
141 particulate backscattering coefficient ( $b_{bp}$ ) following the BGC-Argo procedure (Schmechtig et  
142 al., 2015, 2016b; Organelli et al., 2017b). This procedure included a correction of non-  
143 photochemical quenching for *Chl<sub>a</sub>* following Xing et al., (2012) method. In addition, we  
144 applied a correction factor to *Chl<sub>a</sub>* fluorescence measurements from the BGC-Argo floats,  
145 following the recommendation of Roesler et al., (2017). Comparing estimates of *Chl<sub>a</sub>* from  
146 the WET Labs ECO fluorometers (used on BGC-Argo floats) with *Chl<sub>a</sub>* estimates from other  
147 methods, these authors evidenced a bias varying according to the region sampled. In order to  
148 quantify this bias, they calculated the slope of the relationship between the *Chl<sub>a</sub>* values from  
149 the ECO fluorometers and those estimated independently using HPLC analyses. This bias was  
150 further confirmed using optical proxies such as *in situ* radiometric measurements (Xing et al.,  
151 2011) or algal absorption measurements (Boss et al., 2013; Roesler and Barnard, 2013). At a  
152 global scale, Roesler et al. (2017) evidenced an overestimation of the *Chl<sub>a</sub>* concentration by a  
153 factor of 2, on which regional variations of the fluorescence-to- *Chl<sub>a</sub>* ratio are superimposed.  
154 This correction factor applied to BGC-Argo data was found to have little impact on the  
155 interpretation of the results on a global scale (Barbieux et al., 2017; Organelli et al., 2017a)  
156 and did not modify the interpretation of the present results, especially because the regional  
157 correction factors proposed by Roesler et al. (2017) for the Mediterranean Sea are very close

158 to the global factor of 2 (1.62 and 1.72 for the Western and Eastern Basin, respectively).  
159 Finally a quality-controlled procedure was performed following the BGC-Argo  
160 recommendations (Schmechtig et al., 2016a). All data were also visually checked in order to  
161 detect any drift over time or sensor deficiency. These data were made freely available by the  
162 International Argo Program ([http:// www.argo.ucsd.edu](http://www.argo.ucsd.edu), <http://argo.jcommops.org>) and the  
163 CORIOLIS project (<http://www.coriolis.eu.org>).

164 After binning the data at a 1-m resolution, the mixed layer depth (MLD) was derived  
165 from the CTD data using the density criterion of de Boyer Montégut (2004). The MLD was  
166 calculated as the depth where the density difference compared to the surface (10 m) reference  
167 value is  $0.03 \text{ kg m}^{-3}$ . The depth of the SCM and of the Subsurface  $b_{bp}$  Maximum ( $Sb_{bp}M$ ) was  
168 identified as the depth where the absolute value of  $Chla$  or  $b_{bp}$  reaches a maximum below the  
169 MLD. Large spikes associated with particle aggregates or zooplankton (Gardner et al., 2000;  
170 Briggs et al., 2011) were observed in the  $b_{bp}$  profiles and made it sometimes difficult to  
171 identify the depth of the  $Sb_{bp}M$ . Hence, for the purpose of the  $Sb_{bp}M$  retrieval exclusively, the  
172  $b_{bp}$  values were smoothed with a mean filter (5-point window). To study the SCM dynamics  
173 and obtain the width of the SCM that may fluctuate in space and time, a Gaussian profile was  
174 adjusted to each  $Chla$  vertical profile of the database that presented a SCM. This approach  
175 first proposed by Lewis et al. (1983) has been widely used in oceanographic studies (e.g.  
176 Morel and Berthon, 1989; Uitz et al., 2006; Barbieux et al., 2017). The width of the gaussian  
177 adjusted to the vertical profile of  $Chla$  represented the width of the SCM. The SCM layer was  
178 defined as the layer extending across the entire width of the SCM. The upper (or lower) limit  
179 was retrieved by removing (or adding) half of the width of the SCM to the absolute depth of  
180 the SCM.

### 181 2.3 Estimation of nitrate concentration

182 The SUNA sensor measures the light absorption in the wavelength range from 217 to  
183 240 nm. In this spectral band, the light absorption is dominated by nitrates and bromides, and,  
184 to a much lesser extent, by organic matter (Johnson and Coletti, 2002). Various algorithms  
185 were developed to obtain the nitrate concentration ( $[\text{NO}_3^-]$ ) from the measured light  
186 absorption spectrum (*e.g.* Arai et al., 2008; Zielinski et al., 2011). The TCSS algorithm was  
187 specifically developed to take into account the temperature dependency of the bromide  
188 spectrum, which significantly improved the accuracy of the retrieved  $[\text{NO}_3^-]$  (Sakamoto et al.,  
189 2009). This algorithm was recently modified to also take into account a pressure dependency  
190 (Pasqueron de Fommervault et al., 2015a; Sakamoto et al., 2017). Previous studies also  
191 evidenced the inaccuracy of standard calibration procedures (D'Ortenzio et al., 2014;  
192 Pasqueron de Fommervault et al., 2015a) and showed that SUNA sensors often undergo offset  
193 issue and drift over time [Johnson and Coletti, 2002]. Johnson et al. (2017) proposed a  
194 method to correct these issues for the Southern Ocean. Using the GLODAP-V2 database  
195 (<http://cdiac.ornl.gov/oceans/GLODAPv2>) of *in situ* measurements, the authors determined an  
196 empirical relationship allowing the estimation of the  $[\text{NO}_3^-]$  at depth ( $[\text{NO}_3^-]_{\text{deep\_pred}}$  for  
197 nitrate concentration deep reference value) using a multiple linear regression (MLR) with  
198 physical and geolocation parameters as predictors (salinity, temperature, oxygen, latitude and  
199 longitude). BGC-Argo profiles of nitrate concentration were then corrected by adjusting the  
200 SUNA measurements to the retrieved deep reference value. Following a similar approach, we  
201 established a regional empirical relationship for the Mediterranean Sea (Eq.1) allowing to  
202 retrieve the  $[\text{NO}_3^-]_{\text{deep\_pred}}$  values using parameters that were systematically measured by  
203 the BGC-Argo floats (*i.e.* latitude, longitude, temperature and salinity). For the Mediterranean  
204 Sea, oxygen was not used as an input parameter of the MLR as this parameter was not



205 systematically available for the BGC-Argo floats of our database. Moreover, its absence in  
206 the MLR as an input parameter did not affect the retrieval of the nitrate concentrations.  
207 Comparing the nitrate concentrations predicted by the MLR to the nitrate concentrations from  
208 GLODAP-V2 data, the determination coefficients of the relationship presented very similar  
209 values for the model with and without oxygen (see Figure S1 in Supplement 1).

210 Hence, the following equation was finally used:

$$211 \quad [\text{NO}_3^-]_{\text{deep\_pred}} = 454.28 - 0.002 \times \text{Latitude} - 0.0473 \times \text{Longitude} + 1.7262 \times \text{Temperature} - \\ 212 \quad 12.165 \times \text{Salinity} \quad (1)$$

213 A strong correlation was noticed between the nitrate concentrations predicted from the MLR  
214 model and the measurements provided in the GLODAP-V2 database. This correlation was  
215 associated with a strong determination coefficient ( $R^2 = 0.89$ ) and a small root mean square  
216 error ( $\text{RMSE} = 0.52 \mu\text{mol L}^{-1}$ ). Then, comparing the predicted climatology-based with the  
217 observed BGC-Argo nitrate concentrations at depth and computing the adjusted nitrate  
218 concentration for each depth, we obtained the following equation:

$$219 \quad [\text{NO}_3^-]_{\text{adjusted}}(t,z) = [\text{NO}_3^-]_{\text{raw}}(t,z) - ([\text{NO}_3^-]_{\text{deep\_obs}}(t) - [\text{NO}_3^-]_{\text{deep\_pred}}(t)) \quad (2)$$

220 with  $[\text{NO}_3^-]_{\text{raw}}(t,z)$  corresponding to the raw nitrate value from the SUNA sensor.

221 The BGC-Argo  $[\text{NO}_3^-]$  profiles of the Mediterranean database were compared with *in*  
222 *situ* measurements collected simultaneously to float deployment (see Taillandier et al., 2017  
223 for more details), using the classic colorimetric method (Morris and Riley, 1963). We  
224 demonstrated that the retrieval of the BGC-Argo  $[\text{NO}_3^-]$  with the proposed calibration  
225 procedure was satisfying. The comparison between the nitrate concentrations retrieved from  
226 the BGC-Argo floats to the reference *in situ* measurements (Figure 2) showed a robust  
227 relationship ( $R^2 = 0.86$  and slope = 0.97,  $N = 162$ ).

228 The nitracline that separates upper nitrate-depleted waters from lower repleted waters  
 229 corresponds, in this paper, to the depth where  $[\text{NO}_3^-]$  is  $1 \mu\text{M}$  smaller than the median  $[\text{NO}_3^-]$   
 230 value in the first 10 meters of the water column (Lavigne et al., 2013). The diffusive vertical  
 231 supply of nitrates to the euphotic zone is not only influenced by the depth of the nitracline  
 232 from the sunlit surface layer but also by the slope of the nitracline. The slope of the nitracline  
 233 was calculated as the vertical  $[\text{NO}_3^-]$  gradient between the isocline  $1 \mu\text{M}$  and the isocline  $3$   
 234  $\mu\text{M}$  as already done for the Mediterranean Sea by Pasqueron de Fommervault et al. (2015a).

#### 235 **2.4 Estimation of daily PAR**

236 The BGC-Argo vertical profiles of PAR were quality-checked following Organelli et al.  
 237 (2016). Only solar noon profiles were considered for our analysis because zenith  
 238 measurements ensure the best retrieval (Organelli et al., 2017) of the isolume, *i.e.* depth  
 239 corresponding to a chosen value of light. BGC-Argo floats provide instantaneous PAR  
 240 (iPAR) measurements just beneath the sea surface at local noon (iPAR( $0^-$ , noon)).

241 From iPAR measurement, a vertical profile of daily-averaged PAR was estimated  
 242 following the method of Mignot et al. (2018). This method relies on a theoretical clear-sky  
 243 estimate of iPAR just beneath the sea surface using the solar irradiance model SOLPOS  
 244 developed by the National Renewable Energy Laboratory (NREL, 2000). Hence, we followed  
 245 three main steps:

246 (1) The instantaneous photosynthetically available radiation just beneath the sea surface at  
 247 time  $t$ , iPAR( $0^-$ ,  $t$ ) in  $\mu\text{mol photons m}^{-2} \text{s}^{-1}$ , was determined from Eq. (3):

$$248 \text{iPAR}(0^-, t) = \text{iPAR}_{\text{clear}}(0^-, t) \frac{\text{iPAR}(0^-, \text{noon})}{\text{iPAR}_{\text{clear}}(0^-, \text{noon})} \quad (3)$$

249 with  $\text{iPAR}_{\text{clear}}(0^-, t)$  the theoretical estimate of iPAR just beneath the sea surface at time  $t$ ,  
 250  $\text{iPAR}(0^-, \text{noon})$  the float measurement of iPAR just beneath the sea surface at local noon,

251 and  $iPAR_{clear}(0^-, noon)$  the theoretical estimate of  $iPAR$  just beneath the sea surface at local  
 252 noon for the same time and location as the float measurement. The ratio of  $iPAR(0^-, noon)$  to  
 253  $iPAR_{clear}(0^-, noon)$  represented an index of the cloud coverage at noon, which was applied  
 254 to the clear-sky  $iPAR$  estimates at any time  $t$ . This approach thus assumes that the cloud  
 255 coverage at noon is representative of the daily cloud coverage. Although the cloud coverage is  
 256 unlikely to be constant throughout the entire day, this approach enabled to account for the  
 257 daily course of light through modeled estimates, rather than considering only the noon-time  
 258 instantaneous float measurements.

259 (2) The daily-averaged  $PAR$  just beneath sea surface,  $PAR(0^-)$  in  $mol\ photons\ m^{-2}\ d^{-1}$ , was  
 260 obtained by averaging Eq. (3) over daylength. In parallel, the diffuse attenuation coefficient  
 261 for  $PAR$ ,  $K_d(PAR)$  in unit of  $m^{-1}$ , was derived from the float  $iPAR$  measurements by fitting a  
 262 linear least square regression forced through the origin between the data of  
 263  $\ln\left(\frac{iPAR_{float}(z, noon)}{iPAR_{float}(0^-, noon)}\right)$  and  $z$  taken in the upper 40 m of the water column [*Mignot et al.*,  
 264 2018].

265 (3) Finally, the daily-averaged  $PAR$  for each depth  $z$  of the water column,  $PAR(z)$  in units of  
 266  $mol\ photons\ m^{-2}\ d^{-1}$ , was calculated from  $K_d(PAR)$  and  $PAR(0^-)$  as follows:

$$267 \quad PAR(z) = PAR(0^-) \exp(-K_d(PAR)z) \quad (4)$$

268 Additionally, the isolume  $0.3\ mol\ quanta.m^{-2}\ d^{-1}$ , which corresponds to the dataset  
 269 median daily  $PAR$  value at the SCM depth, was used as an indicator of the light available for  
 270 photosynthesis at the SCM level. We also computed the euphotic layer depth ( $Z_{eu}$ ) as the  
 271 depth where the  $PAR$  is reduced to 1% of its surface value (Gordon and McCluney, 1975) and  
 272 the penetration depth ( $Z_{pd}$ ) calculated as  $Z_{eu} / 4.6$ . The surface layer corresponds to the layer  
 273 extending from 0 to  $Z_{pd}$ .

274

## 275 **2.5 Definition of the SCM Layer**

276 To study specifically the dynamics of the bio-optical properties in the SCM layer, we  
277 adjusted a Gaussian profile to each vertical profile of Chla of the database that presented a  
278 subsurface Chla maximum and computed the width of this SCM. This parameterizing  
279 approach proposed by Lewis et al., (1983) has been widely used to fit vertical profiles of Chla  
280 (e.g., Morel and Berthon, 1989; Uitz et al., 2006) such as:

$$281 \quad c(z) = c_{\max} e^{-\left(\frac{z-z_{\max}}{\Delta z}\right)^2} \quad (5)$$

282 where  $c(z)$  is the Chla concentration at depth  $z$ ,  $c_{\max}$  is the Chla concentration at the depth of  
283 the SCM ( $z_{\max}$ ), and  $\Delta z$ , the unknown, is the width of the SCM. In order to retrieve  $\Delta z$ , the  
284 unknown parameter, we performed an optimization of equation (5) with a maximum width set  
285 at 50 m so only the profiles with a relatively pronounced SCM are kept. Finally, in this study,  
286 the different biogeochemical variables are averaged in this SCM layer (cf. Figures 3, 4, 6 and  
287 11).

## 288 **2.6 Statistical method of classification of the vertical profiles providing the** 289 **identification of the SCM**

290 A statistical method based on the Singular Value Decomposition (SVD) algorithm  
291 (Golub and Van Loan, 1996) was used to identify the different types of SCMs in the  
292 Mediterranean Sea. The approach allowed to tackle the large amount of data provided by the  
293 BGC-Argo floats and to simultaneously classify the Chla and  $b_{bp}$  vertical profiles of the  
294 database. Based on the shape of the Chla or  $b_{bp}$  vertical profile, the method did not require an  
295 *a priori* knowledge on the considered profile such as in previous studies (e.g. Uitz et al.,  
296 2006; Mignot et al., 2011; Lavigne et al., 2015). The present method involved three major  
297 steps summarized as follows (see Supplementary Material 2 for more details):

298 (1) Each vertical profile of  $Chla$  and  $b_{bp}$  were normalized in depth and magnitude. The depths  
299 were normalized by the euphotic depth ( $Z_{eu}$ ) and the  $Chla$  and  $b_{bp}$  values were normalized to  
300 the maximum value of each profile (i.e.  $Chla_{max}$  and  $b_{bpmax}$ , respectively). Ultimately, the  
301  $Chla$  and  $b_{bp}$  values of a profile were joined by one end, to obtain a dimensionless, twice as  
302 long, “metaprofile” that was subsequently classified on the basis of its shape.

303 (2) A Principal Component Analysis (PCA) was performed using the Singular Value  
304 Decomposition algorithm (Pearson, 1901). The singular values were ordered in decreasing  
305 order and only the first  $N$  values were kept.  $N$  was chosen so that the corresponding singular  
306 vectors capture 95% of variance of the dataset and the resulting vertical profiles of  $Chla$  and  
307  $b_{bp}$  were ecologically meaningful (see Supplement 2 provided as electronic supplementary  
308 material).

309 (3) Each singular vector defined a profile shape. A dimensionless metaprofile can be  
310 represented as a linear combination of those shapes, each multiplied by a coefficient. To  
311 classify each metaprofile in a category of shape, we used a numerical optimization algorithm  
312 on the whole set of coefficients to maximize the value of one coefficient while minimizing the  
313  $N-1$  others, for each metaprofile. The coefficient that was maximal for each metaprofile  
314 defined its class of shape. More details on the method are provided as electronic  
315 supplementary material.

316 For each of the five regions of the Mediterranean considered, we finally obtained the  
317 dominant shapes of vertical  $Chla$  and  $b_{bp}$  profiles, which are representative of the different  
318 situations encountered along an annual cycle. This approach allowed to establish a typology  
319 of SCMs in the BGC-Argo database and to report their frequency of occurrence in each  
320 region.

## 321 **3 RESULTS & DISCUSSION**

### 322 **3.1 Regional and seasonal variability of the SCM**

323 Using a climatological approach, we first examined the characteristics of the SCMs  
324 such as their depth, thickness and amplitude in order to better apprehend their vertical  
325 dynamics in the water column along the Mediterranean west-to-east gradient. Then, the  
326 seasonal variations of the biogeochemical properties (Chl $a$  and  $b_{bp}$ ) at the SCM level were  
327 studied in relation to environmental conditions. This ultimately led us to identify and  
328 describe the main types of SCMs in the five considered regions of the Mediterranean Sea.

#### 329 **3.1.1 Variability of the SCM along the west-to-east gradient**

330 The well-known west-to-east trophic gradient of the Mediterranean was observed in  
331 the present dataset, with a decrease in the surface Chl $a$  from the NW region (median value of  
332 0.15 mg m $^{-3}$ ) to the LEV region (median value of 0.04 mg m $^{-3}$ ; Figure 3a). A decrease in the  
333 amplitude of the SCM paralleled the surface gradient, with decreasing mean Chl $a$  and  $b_{bp}$   
334 values in the SCM from the NW to the LEV (0.45 to 0.24 mg m $^{-3}$  and 0.00088 to 0.00050 m $^{-1}$   
335 for Chl $a$  and  $b_{bp}$ , respectively) (Figures 3b-c). In the Eastern Basin (*i.e.* ION and LEV), only  
336 27% of the Chl $a$  values were distributed above the median value calculated for the entire  
337 Mediterranean Basin (0.28 mg m $^{-3}$ ) whereas 66% of the Chl $a$  values exceeded it in the  
338 Western Basin (*i.e.* NW, SW, and TYR; Figure 4). Similarly, in the Eastern Basin, only ~30%  
339 of the  $b_{bp}$  values exceeded the median value calculated for the entire Mediterranean Sea in the  
340 SCM (0.00058 m $^{-1}$ ) (*i.e.* 32% and 29% for the ION and LEV, respectively; Figures 4d-e)  
341 whereas in the Western Basin, ~75% of the  $b_{bp}$  values were distributed above the global  
342 median value (*i.e.* 81%, 80% and 71% for the NW, SW and TYR, respectively, Figures 4a-c).

343 In parallel, from the NW to the LEV regions, a deepening of the SCM (median values  
344 of 58 and 95 m, respectively; Figure 3d) and an increase in its thickness (median values of 43  
345 and 72 m, respectively; Figure 3e) was observed. A statistical Wilcoxon test revealed non-  
346 identical distributions of the considered variables (SCM amplitude, depth and thickness)  
347 among the different Mediterranean regions (significance level  $p < 0.001$ ). Our results suggest  
348 that the well-known west-to-east trophic gradient of the Mediterranean occurs not only at the  
349 surface but also at depth. As suggested by previous studies (Mignot et al., 2014; Lavigne et  
350 al., 2015), we confirm that the thickness and depth of the SCM are inversely related to its  
351 amplitude. The eastward weakening, deepening and increase in the thickness of the SCM is  
352 gradual across the Mediterranean Sea.

### 353 **3.1.2 Seasonal variations of $Chl a$ and $b_{bp}$**

354 The seasonal cycle of the  $Chl a$  in the SCM was more pronounced in the Western  
355 Basin than in the Eastern Basin. This was especially true for the NW (Figure 4a) with median  
356 values of  $Chl a$  reaching  $\sim 0.8 \text{ mg m}^{-3}$  in June-July and  $\sim 0.3 \text{ mg m}^{-3}$  in January-February.  
357 Similarly, the seasonal cycle of  $b_{bp}$  in the SCM was more pronounced in the Western part of  
358 the Mediterranean Sea than in the Eastern Basin. Depending on the region and period of the  
359 year, the  $Chl a$  and  $b_{bp}$  values showed synchronous or decoupled seasonal cycles. In the  
360 Western Basin, the  $b_{bp}$  and  $Chl a$  seasonal cycles were coupled. The NW and TYR regions of  
361 the Western Basin showed a seasonal cycle characterized by two  $Chl a$  peaks at the SCM in  
362 March-April and June-July (the SW region presents a single maximum from April to July)  
363 and a simultaneous increase in  $b_{bp}$  recorded in April-June (Figures 4a-c). On the opposite, the  
364 ION and the LEV presented a unique maximum of  $Chl a$  in June that is delayed compared to  
365 the  $b_{bp}$  seasonal maximum occurring in February-April (Figures 4d-e).

366 The chlorophyll *a* concentration is the most commonly used, yet imperfect, indicator of  
367 the phytoplankton biomass (Cleveland et al., 1989; Geider, 1993). Variations in *Chl a* may  
368 reflect changes in either phytoplankton carbon (Furuya, 1990; Hodges and Rudnick, 2004;  
369 Beckmann and Hense, 2007) or in intracellular content as a result of physiological processes  
370 occurring in phytoplankton cells, photoacclimation in particular (Geider et al., 1997; Fennel  
371 and Boss, 2003). The particulate backscattering coefficient is considered as a proxy of the  
372 abundance of particles (Morel and Ahn, 1991; Stramski and Kiefer, 1991; Loisel and Morel,  
373 1998; Stramski et al., 2004) and of the stock of Particulate Organic Carbon (POC) in the open  
374 ocean waters (Stramski et al., 1999; Balch et al., 2001; Cetinić et al., 2012; Dall’Olmo and  
375 Mork, 2014). In contrast with *Chl a*, it provides information on the whole pool of particles, not  
376 specifically on phototrophic organisms. The backscattering coefficient also depends on  
377 several parameters such as the size distribution, nature, shape, structure and refractive index  
378 of the particles (Morel and Bricaud, 1986; Babin and Morel, 2003; Huot et al., 2007b;  
379 Whitmire et al., 2010).

380 The vertical and seasonal coupling of *Chl a* and  $b_{bp}$  has been shown to reflect an actual  
381 increase in carbon biomass whereas a decoupling could result from photoacclimation or from  
382 a change in the nature or size distribution of the particle assemblage (Flory et al., 2004;  
383 Behrenfeld et al., 2005; Siegel et al., 2005). The results presented above indicate that the  
384 Western Basin presents higher values of *Chl a* and  $b_{bp}$  in the SCM compared to the Eastern  
385 Basin and displays a coupling of the properties all year long (Figure 4). Hence, we suggest  
386 that in the NW, SW and TYR regions, the SCM sustains larger phytoplankton carbon biomass  
387 than in the ION and LEV regions. Furthermore, in this Eastern part of the Mediterranean Sea,  
388 the SCM results, at first order, from physiological acclimation to low light and/or from a  
389 modification of the nature of the particle assemblage. In the next section, we will analyse the



390 environmental conditions occurring at the SCM level and attempt to determine the factors  
391 underpinning the seasonal occurrence of SCMs in the different regions.

### 392 **3.1.3 Environmental factors controlling the SCM**

393 From a bottom-up perspective, it is the balance between light and nutrient limitations  
394 that influences the establishment of phytoplankton communities at depth (Kiefer et al., 1976;  
395 Cullen, 1982; Klausmeier and Litchman, 2001; Ryabov, 2012; Latasa et al., 2016). To explore  
396 the light-nutrient regime within the SCM layer, a monthly climatology of the isolume and  
397 nitracline in the different considered regions was represented along with the depth of the  
398 Subsurface Chl $a$  and  $b_{bp}$  Maxima (*i.e.* SCM and  $Sb_{bp}M$ , respectively). The MLD was also  
399 superimposed in order to illustrate physical forcings (Figure 5).

400 In the Western Basin, the isolume  $0.3 \text{ mol quanta m}^{-2} \text{ d}^{-1}$ , the nitracline  $1 \text{ } \mu\text{mol}$ , the  
401  $Sb_{bp}M$  and the SCM were all located at a similar depth during the oligotrophic period  
402 (maximum depth difference  $< 20 \text{ m}$ ; Figures 5a-c). In accordance with previous findings (*e.g.*  
403 Pasqueron de Fommervault et al., 2015a), our results suggest that in the NW region of the  
404 Mediterranean Sea, the winter deepest climatological mixed layer depth reached the  
405 nutricline, thus likely inducing nutrient input to the surface layer. In the TYR region, the  
406 MLD was always shallower than the nutricline during the winter season but the difference  
407 between the MLD and the nutricline remained very small all year long. Hence, in the Western  
408 Basin of the Mediterranean Sea both light and nutrient resources seem to be available and  
409 probably support an actual increase in phytoplankton biomass (Figures 5 and 6a-b). In the  
410 Northwestern part of the Mediterranean Sea, the MLD was deeper than the nutricline  $\sim 20\%$  of  
411 the time during an annual cycle (Figure 6e) essentially during the winter season (Figure 5 a-  
412 c). The shallowest (median of  $61 \text{ m}$ ; Figure 6c) and the steepest (slope of  $90 \text{ } \mu\text{mol m}^{-4}$ ; Figure  
413 6d) nitraclines were also recorded in this region, thus confirming an important upward

414 diffusive flux of nitrates available to sustain phytoplankton biomass and eventually allowed  
415 the occurrence of a Subsurface Biomass Maximum.

416 In contrast, in the ION and LEV regions, the isolume  $0.3 \text{ mol quanta m}^{-2} \text{ d}^{-1}$ , nitracline 1  
417  $\mu\text{mol}$ , SCM and  $S_{b_{bp}M}$  were not collocated in the water column (Figures 5d-e). The  
418 difference between the depths of the SCM and nitracline was  $\sim 50 \text{ m}$  during the stratified  
419 period (Figures 5d-e and 6a) and the  $S_{b_{bp}M}$  was shallower than the SCM (by  $\sim 40 \text{ m}$ ),  
420 suggesting that the standing stock of carbon is maintained at a higher concentration above the  
421 depth of the SCM. In the Eastern Basin (Ionian and Levantine Sea), the MLD almost never  
422 reached the nutricline even during the winter period as it was deeper than the nutricline only  
423  $< 3\%$  of the time during an annual cycle (Figure 6e). The nutricline was deeper ( $\sim 120 \text{ m}$  in  
424 Eastern Basin *versus*  $\sim 70 \text{ m}$  in Western Basin; Figure 6c) and the nutrient gradient was also  
425 less sharp (nitracline slope of  $\sim 40 \mu\text{mol m}^{-4}$  in Eastern Basin *versus*  $\sim 90 \mu\text{mol m}^{-4}$  in Western  
426 Basin; Figure 6d) than in the Western part of the Mediterranean Sea, suggesting a weak  
427 upward diffusive flux of nitrates that corroborates previous results (Tanhua et al., 2013;  
428 Pasqueron de Fommervault et al., 2015b). The inverse relationship between the nitracline  
429 steepness and the thickness of the SCM is also confirmed (Gong et al., 2017). The PAR at the  
430 SCM level was significantly lower in this Eastern part than in the Western part of the  
431 Mediterranean Sea (Wilcoxon test at a significance level of  $p < 0.001$ ; Figure 6b). The  
432 development of the SCM in this system is, thus, likely to be limited by both the availability of  
433 light and nutrients. The SCM still settles at a depth where light is available at a sufficient level  
434 to sustain photosynthesis, but never reaches the nitracline.

### 435 **3.1.4 Coupling and decoupling of $b_{bp}$ and $Chl a$ in the SCM**

436 We have seen that the SCM of the Western Basin benefits from both light and nutrient  
437 resources. In these conditions, the observed simultaneous increase in  $Chl a$  and  $b_{bp}$  at the SCM

438 most likely represents an actual development of phytoplankton biomass, as indicated by the  
439 concordance between the depths of the SCM and the  $S_{b_{bp}M}$  (Figure 5). On the opposite, in the  
440 Eastern part of the Mediterranean Sea, the maxima of Chla and  $b_{bp}$  are not co-located. This  
441 result suggests that environmental conditions, typically the light conditions, might inhibit the  
442 increase in phytoplankton biomass.

443 In the Eastern Basin of the Mediterranean Sea, the microorganisms are, most probably,  
444 acclimated or even adapted to the environmental conditions. While photoacclimation is  
445 defined as a short-term acclimation of a photosynthetic organism to changing irradiance,  
446 photoadaptation refers to the long-term evolutionary adaptation of photosynthetic organisms  
447 to ambient light conditions, through genetic selection. SCM species are known to use  
448 different strategies such as photoacclimation to low light (i.e. increase in the intracellular  
449 pigment content), mixotrophy or small-scale directed movements towards light (Falkowski  
450 and Laroche, 1991; Geider et al., 1997; Clegg et al., 2012). Phytoplankton species are also  
451 likely to have different carbon-to-chlorophyll ratio (Falkowski et al., 1985; Geider, 1987;  
452 Cloern et al., 1995; Sathyendranath et al., 2009) and  $b_{bp}$  properties (Vaillancourt et al., 2004;  
453 Whitmire et al., 2010), and a vertical shift toward species photoadapted to the particular  
454 environmental conditions prevailing in the SCM layer is a well-known phenomenon (e.g.  
455 Pollehne et al., 1993; Latasa et al., 2016). For example, two ecotypes of *Prochlorococcus*,  
456 characterized by different accessory pigment contents are known to be adapted to either low-  
457 light or high-light conditions and to occupy different niches in the water column (Moore and  
458 Chisholm, 1999; Bouman et al., 2006; Garczarek et al., 2007). In particular, the low-light  
459 ecotype, characterized by increased intracellular pigmentation, has been frequently observed  
460 at the SCM level in the Mediterranean, especially in the Eastern part (Brunet et al., 2006;  
461 Siokou-Frangou et al., 2010). A west-to-east modification in the composition of  
462 phytoplankton communities in the SCM toward a dominance of picophytoplankton species

463 adapted to recurring light limitation, has been observed (Christaki et al., 2001; Siokou-  
464 Frangou et al., 2010; Crombet et al., 2011). A vertical decoupling between  $b_{bp}$  and Chla could  
465 thus illustrate either a photoacclimation of phytoplankton cells or the occurrence of specific  
466 phytoplankton communities adapted to the conditions prevailing in the SCM layer.

467         Although photoacclimation seems to be a widespread hypothesis in numerous studies to  
468 explain the vertical decoupling of Chla and  $b_{bp}$  (e.g. Brunet et al., 2006; Cullen, 1982; Mignot  
469 et al., 2014), it should yet be reminded that this decoupling could also result from a change in  
470 the nature or size distribution of the entire particle pool. Small particles are, for example,  
471 known to backscatter light more efficiently than large particles (Morel and Bricaud, 1986;  
472 Stramski et al., 2004). A higher proportion of nonalgal particles in the Eastern compared to  
473 the Western Basin could thus explain the decoupling between  $b_{bp}$  and Chla. The nonalgal  
474 particles compartment is defined as the background of submicronic living biological cells (i.e.  
475 viruses or bacteria) and non-living particles (i.e. detritus or inorganic particles) and is  
476 typically known to represent a significant part of the particulate assemblage in oligotrophic  
477 ecosystems (Morel and Ahn, 1991; Claustre et al., 1999; Stramski et al., 2001).

478         Finally, photoacclimation processes as well as vertical gradients in phytoplankton  
479 species or in the non-phytoplankton particles, also contributing to  $b_{bp}$ , could explain the  
480 vertical decoupling of  $b_{bp}$  and Chla we observed in the Eastern Basin. The different types of  
481 Chla and  $b_{bp}$  vertical profiles depends on both the nature of the particles present in the water  
482 column, the physiology of phytoplanktonic cells and their related bio-optical properties, but  
483 yet our dataset did not allow us to conclude on the dominance of one process compared to the  
484 other.

## 485 **3.2 Classification of the Chl $a$ and $b_{bp}$ vertical profiles**

486 In the previous section, we identified the major environmental factors leading to the  
487 occurrence of two main types of SCMs in the five considered regions of the Mediterranean  
488 Sea. While a concomitant maximum of Chl $a$  and  $b_{bp}$  suggested a carbon biomass maximum, a  
489 decoupling between the vertical distributions of these two properties may reflect  
490 photoacclimation, a modification of the algal community composition, or a change in the  
491 nature and/or size of the particle assemblage. The seasonal and regional variability in this  
492 global picture of the SCM was explored using a statistical approach applied to the BGC-Argo  
493 dataset. Our aim was here to classify the Chl $a$  and  $b_{bp}$  profiles based on their shape. This  
494 led us to propose a typology of the different types of SCMs seasonally encountered in the  
495 five regions of the Mediterranean Sea. It also permitted to assess the frequency of these  
496 different types of SCMs over the seasonal cycle and compare their characteristics among the  
497 various regions of the Mediterranean Sea.

### 498 **3.2.1 The NW: a region with a specific trophic regime**

499 In the NW, the vertical distributions of Chl $a$  and  $b_{bp}$  presented four different shapes  
500 over the annual cycle (Figures 7a-b). The *mixed* shape was characterized by a homogeneous  
501 distribution of Chl $a$  and  $b_{bp}$  (as suggested by the deep mean MLD associated with this type of  
502 profile; Figures 7a-b) and showed occurrence exceeding 60% from December to March  
503 (Figure 8a). The *bloom* shape exhibited high Chl $a$  and  $b_{bp}$  values at surface with maximum  
504 occurrence > 55% in April. The coexistence of the *mixed* and the *bloom* shapes during winter  
505 and spring could result from intermittent mixing that alters the vertical distribution of Chl $a$   
506 and  $b_{bp}$  (e.g. Chiswell, 2011; Lacour et al., 2017). The  $SBM_{aZeu}$  and the  $SBM_{bZeu}$  (SBM  
507 occurring above and below the euphotic depth, respectively) constituted two different cases of  
508 subsurface maximum. In both cases, Chl $a$  and  $b_{bp}$  covaried (Figures 7a-b), the maxima of

509 *Chla* and  $b_{bp}$  were observed at nearly the same depth suggesting an increase in carbon  
510 biomass in subsurface.

511 The  $SBM_{aZeu}$  was often observed in late spring and late summer whereas the  $SBM_{bZeu}$   
512 occurred more frequently ( $> 50\%$ ) in the middle of the oligotrophic period. This results  
513 suggests a deepening of the SCM along the oligotrophic season and corroborates the “light-  
514 driven hypothesis” previously formulated by Letelier et al. (2004) and Mignot et al. (2014).  
515 These authors observed that the seasonal variation of the depth of the SCM depicts the same  
516 displacement as the isolumes and consequently suggested that the SCM depth displacement is  
517 light-driven. In the NW region, the high surface *Chla* of the *bloom* shape (Figure 7a) probably  
518 results in increased light attenuation in the water column from fall to spring. Consequently,  
519 the SCM established shallower in spring than in summer (Figure 5a) and the  $SBM_{aZeu}$  shape  
520 occurred relatively frequently in spring (Figure 8a). Then, from spring to summer, the *Chla*  
521 decrease in the surface layer of the water column resulted in decreased light attenuation and  
522 subsequent deepening of the SCM (Figure 5a), which thus formed a subsurface maximum of  
523 *Chla* and  $b_{bp}$  below the euphotic layer ( $SBM_{bZeu}$ , Figure 8a). Therefore, our results are  
524 consistent with previous studies (e.g. Gutiérrez-Rodríguez et al., 2010; Mayot et al., 2017b)  
525 that highlighted the special status of the Northwestern region, the only region to exhibit the  
526 *bloom* shape and predominantly SBMs during the oligotrophic season (Figures 9a-b).

### 527 **3.2.2 The SW and the TYR: regions of transition**

528 In the Southwestern region as well as in the Tyrrhenian Sea, three shapes characterized  
529 the seasonal variability of the vertical distribution of *Chla* and  $b_{bp}$  (Figures 7c-d and e-f). A  
530 *mixed* shape, similar to that observed in the NW (Figures 9c-d), a *SBM* shape (Figures 9e-f),  
531 and a *SCM* shape (decoupling between the maximum of *Chla* and  $b_{bp}$  at depth) were  
532 successively encountered over the seasonal cycle, with weak differences in their frequency of

533 occurrence among the two regions. The *SCM* shape established shallower in the water column  
534 than the *SBM* shape (Figures 7c-f). It was encountered mainly in winter and fall (~50% of  
535 occurrence), alternating with the *mixed* shape (Figures 8b-c). Thus, this shape probably  
536 illustrates the erosion of the *SCM* by the winter mixing as previously suggested, for example,  
537 in Lavigne et al. (2015). The *SBM* shape occurred mainly during spring and summer (>75%)  
538 when both light and nutrients were available for phytoplankton growth (Figures 5b-c). The  
539 *SBM* shapes of the SW and the TYR were comparable to the *SBM<sub>bZeu</sub>* shape of the NW  
540 occurring at almost the same depth (~ $Z_{eu}$ ). The *SCM* shapes of the SW and TYR were  
541 analogous to the *SCM<sub>aZeu</sub>* shape of the ION and LEV (Figures 9e-h). Hence, our results  
542 suggest that the SW and TYR regions are transition regimes that present types of *SCMs* that  
543 can be found in both the Western and Eastern Basins.

### 544 **3.2.3 The ION and the LEV: oligotrophic end-members**

545 In the Ionian Sea, three different shapes were retrieved along the seasonal cycle, *i.e.* the  
546 *mixed*, the *SCM<sub>aZeu</sub>* and the *SCM<sub>bZeu</sub>* shapes (Figures 7g-h). In this region, the *Chl<sub>a</sub>* maximum  
547 was always decorrelated from the  $b_{bp}$  maximum that revealed higher values at surface than at  
548 depth. In the Levantine Sea, only two distinct shapes were encountered, *i.e.* the *SCM<sub>aZeu</sub>* and  
549 the *SCM<sub>bZeu</sub>* shapes and associated with shallow MLDs (Figures 7i-j). The subsurface  
550 maximum of *Chl<sub>a</sub>* was never associated with a subsurface maximum of  $b_{bp}$ . Such *SCMs*  
551 constituted a permanent pattern with *SCM<sub>bZeu</sub>* and *SCM<sub>aZeu</sub>* reaching occurrences of 100% in  
552 June-July and > 75% in December-March, respectively (Figures 8d-e). The *SCM<sub>bZeu</sub>* shape  
553 was a particularity of the Eastern Basin. This shape was very similar in the ION and LEV, but  
554 very different from the shapes observed in the other regions (Figures 9g-h). This *SCM<sub>bZeu</sub>*  
555 settled below the  $Z_{eu}$  that, in such oligotrophic systems, occurs relatively deep in the water  
556 column (~95 m; Figure 3d). This type of *SCM* was also very thick (~70 m) (Figure 3e) and  
557 associated with low values of the nitracline slope (Figure 6d).

### 558 **3.3 A case study of the Gulf of Lions and Levantine Sea**

559 Both the climatological and statistical approaches proposed in this study allowed us to  
560 characterize the SCM dynamics in five regions of the Mediterranean Sea at large spatial  
561 (interregional) and temporal (seasonal) scales. In the present section, we focused on the data  
562 provided by two BGC-Argo floats that recorded simultaneously bio-optical properties, PAR  
563 and nitrate concentration in two distinct regions, representing the two extremes of the  
564 Mediterranean trophic gradient. This helped to gain understanding of the dynamics of the  
565 SCM at a weekly and regional scale and should give insights in the mechanisms underlying  
566 the occurrence of SCMs in these end-member regimes.

#### 567 **3.3.1 Overview of the two contrasted systems**

568 The float WMO 6901512 (fGL) was been deployed in the Gulf of Lions the 11<sup>th</sup> of  
569 April 2013 and recorded data until the 4<sup>th</sup> of May, 2014 (Figure 10a). The float WMO  
570 6901528 (fLS) collected data in the Levantine Sea from May 18, 2013 to May 23, 2015  
571 (Figure 10c). The two regions presented very different seasonal Chl*a* distribution. The Gulf of  
572 Lions is a typical “temperate-like” system that exhibits a winter period characterized by large  
573 MLDs (Millot, 1999; Lavigne et al., 2015) (maximum MLD > 1000 m, Figure 10d). The  
574 intense mixing induces a refueling of nutrients (Gačić et al., 2002; D’Ortenzio et al., 2014;  
575 Severin et al., 2017), which allows the development of a spring bloom (Marty et al., 2002,  
576 2008; Mayot et al., 2017a) as revealed by the high surface Chl*a* from April to May (Figure  
577 10b). A subsurface maximum of Chl*a* established from the end of May to mid-November at a  
578 depth similar to that of the nitracline 1  $\mu\text{M}$  and isolume 0.3 mol quanta  $\text{m}^{-2} \text{d}^{-1}$ , and displayed  
579 maximum Chl*a* of  $\sim 1 \text{ mg m}^{-3}$  in July (Figure 10b).

580 The Levantine Sea behaves, on the opposite, as a “tropical-like” system. Winter mixing  
581 was weak (maximum MLD of 125 m; Figure 10d) but still able to erode the SCM as



582 suggested by the small increase in surface *Chla* from November to February (Figure 10b).  
583 The seasonal MLD deepening almost never reached the nitracline, thus limiting the nitrate  
584 supply to the upper layer of the water column (Dugdale and Wilkerson, 1988; Lavigne et al.,  
585 2013; Pasqueron de Fommervault et al., 2015a), hence leading to relatively low surface  
586 primary production in this area (Krom et al., 1991; Psarra et al., 2000; Bricaud et al., 2002;  
587 Siokou-Frangou et al., 2010). The SCM is a permanent feature in this region, settling below  
588 the isolume  $0.3 \text{ mol quanta m}^{-2} \text{ d}^{-1}$  and far above the nitracline (Figure 10d).

### 589 3.3.2 Factors limiting the SCM

590 For exploring the limiting factors at the level of the SCM, we used a nutrient-vs-light  
591 resource-limitation diagram. This approach employed in biogeochemical modelling (Cloern,  
592 1999; Li and Hansell, 2016) exploits simultaneously PAR and  $[\text{NO}_3^-]$  data in order to  
593 understand which environmental factor limits phytoplankton growth (Figure 11).

594 In the Gulf of Lions, two different types of situations occurred: (1) very low light compared to  
595 the maximum surface PAR ( $\text{PAR}_{\text{norm}} < 0.025$ ) coupled with  $\text{NO}_3^-_{\text{norm}}$  comprised between 0  
596 and 1, indicative of light limitation; and (2) low light compared to the maximum surface PAR  
597 ( $\text{PAR}_{\text{norm}}$  within the range 0.025-0.15) associated with  $\text{NO}_3^-_{\text{norm}} < 0.15$ , indicative of nitrate  
598 limitation, probably resulting from uptake by phytoplankton (Figure 11a). On the contrary, in  
599 the Eastern part of the Mediterranean Sea, the SCM was always associated with very low light  
600 conditions compared to the maximum surface PAR ( $\text{PAR}_{\text{norm}} < 0.025$ ) and variable  $\text{NO}_3^-_{\text{norm}}$   
601 values comprised between 0.1 and 1 (Figure 11b). This suggests that, even when the nitrate  
602 concentration is sufficient to sustain primary production at the SCM level, another factor  
603 limits phytoplankton growth. Phytoplankton growth at the SCM is probably limited by light  
604 or co-limited by both light and nutrients. Phosphate is also an important limiting factor for  
605 phytoplankton growth in the entire Mediterranean Sea (Marty et al., 2002; Pujo-Pay et al.,

606 2011), the Eastern Basin in particular (Krom et al., 1991, 2010). Hence, in a non-nitrate  
607 limited SCM of the Levantine (Figure 11b), phytoplankton may still be limited by either or  
608 both low phosphate concentrations and low light levels. Since autonomous measurements of  
609 phosphate concentrations are not possible yet, our chemical data are restricted to nitrate so we  
610 cannot conclude on the role of phosphate in the settlement of the SCM.

611 The coupling between Chl*a* and  $b_{bp}$  was studied using the Chl*a*-to- $b_{bp}$  ratio. In both the  
612 Western and Eastern Basins, SCMs with prevailing very low light conditions were  
613 accompanied by high values of the Chl*a*-to- $b_{bp}$  ratio ( $> 300 \text{ mg m}^{-2}$ ). In contrast, in the SCM  
614 of the Western Basin associated with low values of  $\text{NO}_3^-_{\text{norm}}$ , the Chl*a*-to- $b_{bp}$  ratio showed  
615 values  $< 300 \text{ mg m}^{-2}$ . This ratio is a proxy of the Chl*a*-to-POC ratio (Behrenfeld et al., 2015;  
616 Álvarez et al., 2016; Westberry et al., 2016) and constitutes an optical index of  
617 photoacclimation (Behrenfeld et al., 2005; Siegel et al., 2005) or of the phytoplankton  
618 communities (Cetinić et al., 2012, 2015). Hence, in both the Western and Eastern Basins, the  
619 high values of the Chl*a*-to- $b_{bp}$  ratio occurring in the SCM associated with very low light  
620 conditions could be attributed to either photoacclimation of phytoplankton cells to low light  
621 intensity. In contrast, in the SCM of the Western Basin where low values of  $\text{NO}_3^-_{\text{norm}}$  were  
622 reported, the low Chl*a*-to- $b_{bp}$  ratio values could either indicate a higher proportion of detrital  
623 particles or an increase in biomass sustained by a specific phytoplankton assemblage  
624 dominated by communities of nano- or pico-sized cells, including very small diatoms (e.g.  
625 Leblanc et al., 2018).

## 626 **4 CONCLUSIONS**

627 The present study is, to our knowledge, the first examining the spatial and temporal  
628 variability of Subsurface Chlorophyll *a* Maxima (SCMs) in the Mediterranean Sea using  
629 BioGeochemical-Argo profiling floats equipped with both light (PAR) and nitrate ( $[\text{NO}_3^-]$ )

630 sensors. Our study aims to improve the understanding of the characteristics and dynamics of  
631 phytoplankton biomass in the subsurface layer of the Mediterranean Sea. We identified two  
632 major mechanisms controlling the occurrence of SCMs, *i.e.* (1) SCMs arising from an actual  
633 increase in carbon biomass most probably reflecting an increase in phytoplankton biomass  
634 benefiting from both light and nutrient resources (SBMs) with a potentially non negligible  
635 contribution of non-phytoplankton particles at depth; and (2) SCMs that stem from an  
636 increase in intracellular chlorophyll *a* concentration as a result of photoacclimation to low  
637 light levels. In the temperate-like system of the Western Mediterranean Sea, SBMs are  
638 recurrent whereas in the “subtropical-like” system of the Eastern Mediterranean Sea, SCMs  
639 are, at a first order, representative of photoacclimation process. Using a statistical  
640 classification of vertical profiles of Chl*a* and  $b_{bp}$  collected over the entire Mediterranean, we  
641 have evidenced different intermediate SCM situations that can be summarized as follows  
642 (Figure 12):

643 1) The  $SBM_{aZeu}$  is a Subsurface Biomass Maximum that settles above the euphotic zone  
644 in the Northwestern Mediterranean Sea (NW). It is the thinnest (~40m) and shallowest (~60  
645 m) biomass maximum. It is also the most intense, probably because it benefits from adequate  
646 light and nutrient resources, with the deep mixed layer occurring in this region during the  
647 winter period probably inducing a seasonal renewal of the nutrients in the surface layer.

648 2) The  $SBM_{bZeu}$  establishes below the euphotic zone in the NW. As well as the SBMs of  
649 the Southwestern Mediterranean Sea (SW) and Tyrrhenian Sea (TYR), less intense than the  
650  $SBM_{aZeu}$  probably because nutrients conditions are less favourable than in the NW region as  
651 the winter MLD is close to, but never reaches the nutricline.

652 3) The SCM of the SW and TYR as well as the  $SCM_{aZeu}$  (*i.e.* settling above the euphotic  
653 depth) of the Ionian (ION) and Levantine (LEV) Seas are not biomass subsurface maxima,

654 but reflect *Chl a* maxima resulting from photoacclimation. Moving from the SW to LEV  
655 region, the amplitude of the SCM decreases while its thickness increases.

656 4) The  $SCM_{bZ_{eu}}$  of the ION and LEV settle below the euphotic depth and are deeper  
657 (~95 m) than all the other subsurface maxima. They are most probably the consequence of a  
658 decoupling of the MLD and the nutricline and represent the oligotrophic end-member type of  
659 subsurface maxima in the Mediterranean Sea. In these types of SCMs, phytoplankton  
660 communities most probably establish deep in the water column, in order to reach the nutrient  
661 resources. These communities are likely photoacclimated, and also possibly photoadapted, to  
662 the low light conditions encountered at such depths. The phytoplankton assemblage is likely  
663 composed of picophytoplankton (Casotti et al., 2003; Siokou-Frangou et al., 2010), including  
664 the low-light adapted *Prochlorococcus* ecotype (Brunet et al., 2006; Garczarek et al., 2007).

665 In permanently stratified oligotrophic ecosystems, the SCM phytoplankton species may  
666 settle especially deep and adapt to the prevailing low-light levels in order to benefit from  
667 more nutrients. On the contrary, when nitrates are not a limiting factor at the SCM level (e.g.  
668 in the northwestern region after the bloom period), the SCM is only controlled by the amount  
669 of light available at depth. In either case, light is a crucial forcing parameter that controls the  
670 depth of the SCM. Consistently with previous studies conducted in other open ocean regions  
671 (Longhurst and Glen Harrison, 1989; Furuya, 1990; Severin et al., 2017), the present work  
672 suggests that shallower SCMs tend to display larger phytoplankton biomass than deeper  
673 SCMs. In our study, these biomass maxima are characterized by a coupling of *Chl a* and  $b_{bp}$   
674 that suggests an increase in carbon biomass. Finally, the present results indicate that SBMs  
675 represent a frequent feature in the Mediterranean Sea, which contrasts with the idea that  
676 SCMs in oligotrophic regions typically result from photoacclimation of phytoplankton cells.  
677 Thus, we suggest that the contribution of SCMs to primary production, which may be

678 substantial although ignored by current satellite-based estimates, should be further  
679 investigated.

## 680 **ACKNOWLEDGEMENTS**

681 This paper represents a contribution to the following research projects: remOcean  
682 (funded by the European Research Council, grant 246777), NAOS (funded by the Agence  
683 Nationale de la Recherche in the frame of the French “Equipement d’avenir” program, grant  
684 ANR J11R107-F), the SOCLIM (Southern Ocean and climate) project supported by the  
685 French research program LEFE- CYBER of INSU-CNRS, the Climate Initiative of the  
686 foundation BNP Paribas and the French polar institute (IPEV), AtlantOS (funded by the  
687 European Union’s Horizon 2020 Research and Innovation program, grant 2014– 633211), E-  
688 AIMS (funded by the European Commission’s FP7 project, grant 312642), U.K. Bio-Argo  
689 (funded by the British Natural Environment Research Council—NERC, grant NE/  
690 L012855/1), REOPTIMIZE (funded by the European Union’s Horizon 2020 Research and  
691 Innovation program, Marie Skłodowska-Curie grant 706781), Argo-Italy (funded by the  
692 Italian Ministry of Education, University and Research - MIUR), and the French Bio-Argo  
693 program (BGC-Argo France; funded by CNES-TOSCA, LEFE Cyber, and GMMC). We  
694 thank the PIs of several BGC-Argo floats missions and projects: Giorgio Dall’Olmo  
695 (Plymouth Marine Laboratory, United Kingdom; E-AIMS and U.K. Bio- Argo); Kjell-Arne  
696 Mork (Institute of Marine Research, Norway; E-AIMS); Violeta Slabakova (Bulgarian  
697 Academy of Sciences, Bulgaria; E-AIMS); Emil Stanev (University of Oldenburg, Germany;  
698 E-AIMS); Claire Lo Monaco (Laboratoire d’Océanographie et du Climat: Expérimentations et  
699 Approches Numériques); Pierre-Marie Poulain (National Institute of Oceanography and  
700 Experimental Geophysics, Italy; Argo- Italy); Sabrina Speich (Laboratoire de Météorologie  
701 Dynamique, France; LEFE- GMMC); Virginie Thierry (Ifremer, France; LEFE-GMMC);

702 Pascal Conan (Observatoire Océanologique de Banyuls sur mer, France; LEFE-GMMC);  
703 Laurent Coppola (Laboratoire d’Océanographie de Villefranche, France; LEFE-GMMC);  
704 Anne Petrenko (Mediterranean Institute of Oceanography, France; LEFE-GMMC); and Jean-  
705 Baptiste Sallée (Laboratoire d’Océanographie et du Climat, France; LEFE-GMMC). Louis  
706 Prieur and Jean-Olivier Irisson (Laboratoire d’Océanographie de Villefranche, France) are  
707 acknowledged for useful comments and fruitful discussion. We also thank the International  
708 Argo Program and the CORIOLIS project that contribute to make the data freely and publicly  
709 available.

## 710 REFERENCES

- 711 Álvarez, E., X. A. G. Morán, Á. López-Urrutia, and E. Nogueira (2016), Size-dependent photoacclimation of the  
712 phytoplankton community in temperate shelf waters (southern Bay of Biscay), *Marine Ecology Progress Series*, 543,  
713 73–87, doi:10.3354/meps11580.
- 714 Anderson, G. C. (1969), Subsurface Chlorophyll Maximum in the Northeast Pacific Ocean, *Limnology and Oceanography*,  
715 14(3), 386–391.
- 716 Antoine, D., A. Morel, and J.-M. André (1995), Algal pigment distribution and primary production in the eastern  
717 Mediterranean as derived from coastal zone color scanner observations, *Journal of Geophysical Research*, 100,  
718 16193–16209.
- 719 Arai, R., N. Nishiyamal, N. Nakatani, and T. Okuno (2008), Measurement Method of Nutrient using Principal Component  
720 Regression, in *OCEANS 2008-MTS/IEEE Kobe Techno-Ocean, IEEE.*, pp. 1–6.
- 721 Ardyna, M., M. Babin, M. Gosselin, E. Devred, S. Bélanger, A. Matsuoka, and J. E. Tremblay (2013), Parameterization of  
722 vertical chlorophyll a in the Arctic Ocean: Impact of the subsurface chlorophyll maximum on regional, seasonal, and  
723 annual primary production estimates, *Biogeosciences*, 10(6), 4383–4404, doi:10.5194/bg-10-4383-2013.
- 724 Arrigo, K. R., P. A. Matrai, and G. L. Van Dijken (2011), Primary productivity in the Arctic Ocean: Impacts of complex  
725 optical properties and subsurface chlorophyll maxima on large-scale estimates, *Journal of Geophysical Research:*  
726 *Oceans*, 116(11), 1–15, doi:10.1029/2011JC007273.
- 727 Babin, M., A. Morel, V. Fournier-Sicre, F. Fell, and D. Stramski (2003), Light scattering properties of marine particles in  
728 coastal and open ocean waters as related to the particle mass concentration, *Limnology and Oceanography*, 48(2),

729 843–859, doi:10.4319/lo.2003.48.2.0843.

730 Balch, W. M., D. T. Drapeau, J. J. Fritz, B. C. Bowler, and J. Nolan (2001), Optical backscattering in the Arabian Sea—  
731 continuous underway measurements of particulate inorganic and organic carbon, *Deep Sea Research Part I: Oceanographic Research Papers*, 48(11), 2423–2452, doi:10.1016/S0967-0637(01)00025-5.

732

733 Barbieux, M. et al. (2017), Assessing the Variability in the Relationship Between the Particulate Backscattering Coefficient  
734 and the Chlorophyll a Concentration From a Global Biogeochemical-Argo Database, *Journal of Geophysical Research: Oceans*, 123(2), 1229–1250, doi:10.1002/2017JC013030.

735

736 Beckmann, A., and I. Hense (2007), Beneath the surface: Characteristics of oceanic ecosystems under weak mixing  
737 conditions - A theoretical investigation, *Progress in Oceanography*, 75(4), 771–796,  
738 doi:10.1016/j.pocean.2007.09.002.

739 Behrenfeld, M. J., E. Boss, D. A. Siegel, and D. M. Shea (2005), Carbon-based ocean productivity and phytoplankton  
740 physiology from space, *Global Biogeochemical Cycles*, 19(GB1006), 1–14, doi:10.1029/2004GB002299.

741 Behrenfeld, M. J., R. T. O'Malley, E. S. Boss, T. K. Westberry, J. R. Graff, K. H. Halsey, A. J. Milligan, D. A. Siegel, and  
742 M. B. Brown (2015), Revaluating ocean warming impacts on global phytoplankton, *Nature Climate Change*, 6(3),  
743 323–330, doi:10.1038/nclimate2838.

744 Bethoux, J. P., P. Morin, C. Madec, and B. Gentili (1992), Phosphorus and nitrogen behaviour in the Mediterranean Sea,  
745 *Deep Sea Research Part A, Oceanographic Research Papers*, 39(9), 1641–1654, doi:10.1016/0198-0149(92)90053-V.

746 Bosc, E., A. Bricaud, and D. Antoine (2004), Seasonal and interannual variability in algal biomass and primary production in  
747 the Mediterranean Sea, as derived from 4 years of SeaWiFS observations, *Global Biogeochemical Cycles*,  
748 18(GB1005), 1–17, doi:10.1029/2003GB002034.

749 Boss, E., M. Picheral, T. Leeuw, A. Chase, E. Karsenti, G. Gorsky, L. Taylor, W. Slade, J. Ras, and H. Claustre (2013), The  
750 characteristics of particulate absorption, scattering and attenuation coefficients in the surface ocean; Contribution of  
751 the Tara Oceans expedition, *Methods in Oceanography*, 7, 52–62, doi:10.1016/j.mio.2013.11.002.

752 Bouman, H. et al. (2006), Oceanographic Basis of the Global Surface Distribution of Prochlorococcus Ecotypes, *Science*,  
753 312(5775), 918–921, doi:10.1126/science.39.1002.398.

754 de Boyer Montégut, C. (2004), Mixed layer depth over the global ocean: An examination of profile data and a profile-based  
755 climatology, *Journal of Geophysical Research*, 109(C12), 1–20, doi:10.1029/2004JC002378.

756 Bricaud, A., E. Bosc, and D. Antoine (2002), Algal biomass and sea surface temperature in the Mediterranean Basin  
757 Intercomparison of data from various satellite sensors, and implications for primary production estimates, *Remote  
758 Sensing of Environment*, 81(2–3), 163–178, doi:10.1016/S0034-4257(01)00335-2.

- 759 Briggs, N., M. J. Perry, I. Cetinić, C. Lee, E. D'Asaro, A. M. Gray, and E. Rehm (2011), High-resolution observations of  
760 aggregate flux during a sub-polar North Atlantic spring bloom, *Deep Sea Research Part I: Oceanographic Research*  
761 *Papers*, 58(10), 1031–1039, doi:10.1016/j.dsr.2011.07.007.
- 762 Brunet, C., R. Casotti, V. Vantrepotte, F. Corato, and F. Conversano (2006), Picophytoplankton diversity and  
763 photoacclimation in the Strait of Sicily (Mediterranean Sea) in summer. I. Mesoscale variations, *Aquatic Microbial*  
764 *Ecology*, 44(2), 127–141, doi:10.3354/ame044127.
- 765 Casotti, R., A. Landolfi, C. Brunet, F. D'Ortenzio, O. Mangoni, and M. Ribera d'Alcalá (2003), Composition and dynamics  
766 of the phytoplankton of the Ionian Sea (eastern Mediterranean), *Journal of Geophysical Research*, 108(C9), 1–19,  
767 doi:10.1029/2002JC001541.
- 768 Cetinić, I., M. J. Perry, N. T. Briggs, E. Kallin, E. A. D'Asaro, and C. M. Lee (2012), Particulate organic carbon and inherent  
769 optical properties during 2008 North Atlantic Bloom Experiment, *Journal of Geophysical Research*, 117(C06028), 1–  
770 18, doi:10.1029/2011JC007771.
- 771 Cetinić, I., M. J. Perry, E. D'Asaro, N. Briggs, N. Poulton, M. E. Sieracki, and C. M. Lee (2015), A simple optical index  
772 shows spatial and temporal heterogeneity in phytoplankton community composition during the 2008 North Atlantic  
773 Bloom Experiment, *Biogeosciences*, 12(7), 2179–2194, doi:10.5194/bg-12-2179-2015.
- 774 Chiswell, S. M. (2011), Annual cycles and spring blooms in phytoplankton: Don't abandon Sverdrup completely, *Marine*  
775 *Ecology Progress Series*, 443, 39–50, doi:10.3354/meps09453.
- 776 Christaki, U., A. Giannakourou, F. Van Wambeke, and G. Grégori (2001), Nanoflagellate predation on auto- and  
777 heterotrophic picoplankton in the oligotrophic Mediterranean Sea, *Journal of Plankton Research*, 23(11), 1297–1310,  
778 doi:10.1093/plankt/23.11.1297.
- 779 Claustre, H., A. Morel, M. Babin, C. Cailliau, D. Marie, J.-C. Marty, D. Tailliez, and D. Vaulot (1999), Variability in particle  
780 attenuation and chlorophyll fluorescence in the tropical Pacific : Scales, patterns, and biogeochemical implications,  
781 *Journal of Geophysical Research*, 104(C2), 3401–3422.
- 782 Claustre, H. et al. (2010), Bio-optical profiling floats as new observational tools for biogeochemical and ecosystem studies:  
783 Potential synergies with ocean color remote sensing., in *"Proceedings of the OceanObs'09: Sustained Ocean*  
784 *Observations and Information for Society" Conference*, edited by J. Hall, D. E. Harrison, and D. Stammer, ESA Publ.  
785 WPP-306, Venice, Italy, 21–25 Sep.
- 786 Clegg, M. R., U. Gaedke, B. Bohrer, and E. Spijkerman (2012), Complementary ecophysiological strategies combine to  
787 facilitate survival in the hostile conditions of a deep chlorophyll maximum, *Oecologia*, 169(3), 609–622,  
788 doi:10.1007/s00442-011-2225-4.
- 789 Cleveland, J. S., M. J. Perry, D. A. Kiefer, and M. C. Talbot (1989), Maximal quantum yield of photosynthesis in the



790 northwest Sargasso Sea., *Journal of Marine Research*, 47(4), 869–886.

791 Cloern, J. E. (1999), The relative importance of light and nutrient limitation of phytoplankton growth: A simple index of  
792 coastal ecosystem sensitivity to nutrient enrichment, *Aquatic Ecology*, 33(1), 3–16, doi:10.1023/A:1009952125558.

793 Cloern, J. E., C. Grenz, and L. Videgar-Lucas (1995), An empirical model of the phytoplankton chlorophyll: carbon ration-  
794 the conversion factor between productivity and growth rate., *Limnology and Oceanography*, 40(7), 1313–1321.

795 Crombet, Y., K. Leblanc, B. Queguiner, T. Moutin, P. Rimmelin, J. Ras, H. Claustre, N. Leblond, L. Oriol, and M. Pujo-Pay  
796 (2011), Deep silicon maxima in the stratified oligotrophic Mediterranean Sea, *Biogeosciences*, 8(2), 459–475,  
797 doi:10.5194/bg-8-459-2011.

798 Cullen, J. J. (1982), The Deep Chlorophyll Maximum: Comparing Vertical Profiles of Chlorophyll a, *Canadian Journal of*  
799 *Fisheries and Aquatic Sciences*, 39(5), 791–803, doi:10.1139/f82-108.

800 Cullen, J. J., and R. W. Eppley (1981), Chlorophyll Maximum Layers of the Southern-California Bight and Possible  
801 Mechanisms of their Formation and Maintenance, *Oceanologica Acta*, 4(1), 23–32.

802 D’Ortenzio, F., and M. R. D’Alcalà (2009), On the trophic regimes of the Mediterranean Sea: A satellite analysis,  
803 *Biogeosciences*, 6(2), 139–148, doi:10.5194/bg-6-139-2009.

804 D’Ortenzio, F. et al. (2014), Observing mixed layer depth, nitrate and chlorophyll concentrations in the northwestern  
805 Mediterranean: A combined satellite and NO<sub>3</sub> profiling floats experiment, *Geophysical Research Letters*, 41, 6443–  
806 6451, doi:10.1002/2014GL061020.

807 Dall’Olmo, G., and K. A. Mork (2014), Carbon export by small particles in the Norwegian Sea, *Geophysical Research*  
808 *Letters*, 41(8), 2921–2927, doi:10.1002/2014GL059244.

809 Dubinsky, Z., and N. Stambler (2009), Photoacclimation processes in phytoplankton: Mechanisms, consequences, and  
810 applications, *Aquatic Microbial Ecology*, 56(2–3), 163–176, doi:10.3354/ame01345.

811 Dugdale, R. C., and F. P. Wilkerson (1988), Nutrient sources and primary production in the Eastern Mediterranean, in  
812 *Oceanologica Acta*, edited by H. J. Minas and P. Nival, pp. 179–184.

813 Estrada, M., C. Marrasé, M. Latasa, E. Berdalet, M. Delgado, and T. Riera (1993), Variability of deep chlorophyll maximum  
814 in the Northwestern Mediterranean, *Marine Ecology Progress Series*, 92, 289–300, doi:10.3354/meps092289.

815 Falkowski, P. G., and J. Laroche (1991), Acclimation to spectral irradiance in algae, *Journal of Phycology*, 27(1), 8–14,  
816 doi:10.1111/j.0022-3646.1991.00008.x.

817 Falkowski, P. G., Z. Dubinsky, and K. Wyman (1985), Growth-irradiance relationships in phytoplankton, *Limnol. Oceanogr.*,  
818 30(2), 311–321.

819 Fasham, M. J. R., T. Platt, B. Irwin, and K. Jones (1985), Factors affecting the spatial pattern of the deep chlorophyll

820 maximum in the region of the Azores front, *Progress in Oceanography*, 14(C), 129–165, doi:10.1016/0079-  
821 6611(85)90009-6.

822 Fennel, K., and E. Boss (2003), Subsurface maxima of phytoplankton and chlorophyll: Steady-state solutions from a simple  
823 model, *Limnology and Oceanography*, 48(4), 1521–1534, doi:10.4319/lo.2003.48.4.1521.

824 Flory, E. N., P. S. Hill, T. G. Milligan, and J. Grant (2004), The relationship between flocculation area and backscatter during a  
825 spring phytoplankton bloom, *Deep Sea Research Part I: Oceanographic Research Papers*, 51(2), 213–223,  
826 doi:10.1016/j.dsr.2003.09.012.

827 Furuya, K. (1990), Subsurface chlorophyll maximum in the tropical and subtropical western Pacific Ocean: Vertical profiles  
828 of phytoplankton biomass and its relationship with chlorophyll a and particulate organic carbon, *Marine Biology*, 107,  
829 529–539, doi:10.1007/bf01313438.

830 Gačić, M., G. Civitarese, S. Miserocchi, V. Cardin, A. Crise, and E. Mauri (2002), The open-ocean convection in the  
831 Southern Adriatic: A controlling mechanism of the spring phytoplankton bloom, *Continental Shelf Research*, 22(14),  
832 1897–1908, doi:10.1016/S0278-4343(02)00050-X.

833 Garczarek, L. et al. (2007), High vertical and low horizontal diversity of *Prochlorococcus* ecotypes in the Mediterranean Sea  
834 in summer, *FEMS Microbiology Ecology*, 60(2), 189–206, doi:10.1111/j.1574-6941.2007.00297.x.

835 Gardner, W. D., M. J. Richardson, and W. O. Smith (2000), Seasonal patterns of water column particulate organic carbon and  
836 fluxes in the Ross Sea, Antarctica, *Deep Sea Research Part II: Topical Studies in Oceanography*, 47, 3423–3449,  
837 doi:10.1016/S0967-0645(00)00074-6.

838 Geider, R. J. (1987), Light and temperature dependence of the carbon to chlorophyll a ratio in microalgae and cyanobacteria:  
839 Implications for physiology and growth of phytoplankton, *New Phytologist*, 106(1), 1–34.

840 Geider, R. J. (1993), Quantitative phytoplankton physiology: implications for primary production and phytoplankton growth,  
841 *ICES Marine Science Symposium*, 197, 52–62.

842 Geider, R. J., H. L. MacIntyre, and T. M. Kana (1997), Dynamic model of phytoplankton growth and acclimation: Responses  
843 of the balanced growth rate and the chlorophyll a:carbon ratio to light, nutrient-limitation and temperature, *Marine*  
844 *Ecology Progress Series*, 148(1–3), 187–200, doi:10.3354/meps148187.

845 Golub, G. H., and C. F. Van Loan (1996), *Matrix Computations*, The Johns., Baltimore and London.

846 Gong, X., W. Jiang, L. Wang, H. Gao, E. Boss, X. Yao, S. J. Kao, and J. Shi (2017), Analytical solution of the nitracline with  
847 the evolution of subsurface chlorophyll maximum in stratified water columns, *Biogeosciences*, 14(9), 2371–2386,  
848 doi:10.5194/bg-14-2371-2017.

849 Gordon, H. R., and W. R. McCluney (1975), Estimation of the Depth of Sunlight Penetration in the Sea for Remote Sensing,

850 *Applied Optics*, 14(2), 413–416, doi:10.1364/AO.14.000413.

851 Gutiérrez-Rodríguez, A., M. Latasa, M. Estrada, M. Vidal, and C. Marrasé (2010), Carbon fluxes through major  
852 phytoplankton groups during the spring bloom and post-bloom in the Northwestern Mediterranean Sea, *Deep Sea*  
853 *Research Part I: Oceanographic Research Papers*, 57(4), 486–500, doi:10.1016/j.dsr.2009.12.013.

854 Hickman, A. E., C. M. Moore, J. Sharples, M. I. Lucas, G. H. Tilstone, V. Krivtsov, and P. M. Holligan (2012), Primary  
855 production and nitrate uptake within the seasonal thermocline of a stratified shelf sea, *Marine Ecology Progress*  
856 *Series*, 463, 39–57, doi:10.3354/meps09836.

857 Hill, V. J., P. A. Matrai, E. Olson, S. Suttles, M. Steele, L. A. Codispoti, and R. C. Zimmerman (2013), Synthesis of  
858 integrated primary production in the Arctic Ocean: II. In situ and remotely sensed estimates, *Progress in*  
859 *Oceanography*, 110, 107–125, doi:10.1016/j.pocean.2012.11.005.

860 Hodges, B. A., and D. L. Rudnick (2004), Simple models of steady deep maxima in chlorophyll and biomass, *Deep-Sea*  
861 *Research Part I: Oceanographic Research Papers*, 51(8), 999–1015, doi:10.1016/j.dsr.2004.02.009.

862 Holm-Hansen, O., and C. D. Hewes (2004), Deep chlorophyll-a maxima (DCMs) in Antarctic waters: I. Relationships  
863 between DCMs and the physical, chemical, and optical conditions in the upper water column, *Polar Biology*, 27(11),  
864 699–710, doi:10.1007/s00300-004-0641-1.

865 Huot, Y., M. Babin, F. Bruyant, C. Grob, M. S. Twardowski, H. Claustre, and C. To (2007), Relationship between  
866 photosynthetic parameters and different proxies of phytoplankton biomass in the subtropical ocean, *Biogeosciences*,  
867 4(5), 853–868, doi:10.5194/bg-4-853-2007.

868 Ignatiades, L., S. Psarra, V. Zervakis, K. Pagou, E. Souvermezoglou, G. Assimakopoulou, and O. Gotsis-Skretas (2002),  
869 Phytoplankton size-based dynamics in the Aegean Sea (Eastern Mediterranean), *Journal of Marine Systems*, 36(1–2),  
870 11–28, doi:10.1016/S0924-7963(02)00132-X.

871 Johnson, K., and H. Claustre (2016), Bringing Biogeochemistry into the Argo Age, *Eos*, 1–7, doi:10.1029/2016EO062427.

872 Johnson, K., W. Berelson, E. Boss, Z. Chase, H. Claustre, S. Emerson, N. Gruber, A. Körtzinger, M. J. Perry, and S. Riser  
873 (2009), Observing Biogeochemical Cycles at Global Scales with Profiling Floats and Gliders: Prospects for a Global  
874 Array, *Oceanography*, 22(3), 216–225, doi:10.5670/oceanog.2009.81.

875 Johnson, K. S., and L. J. Coletti (2002), In situ ultraviolet spectrophotometry for high resolution and long-term monitoring of  
876 nitrate, bromide and bisulfide in the ocean, *Deep-Sea Research Part I: Oceanographic Research Papers*, 49(7), 1291–  
877 1305, doi:10.1016/S0967-0637(02)00020-1.

878 Johnson, K. S. et al. (2017), Biogeochemical sensor performance in the SOCCOM profiling float array, *Journal of*  
879 *Geophysical Research: Oceans*, 122(8), 6416–6436, doi:10.1002/2017JC012838.

880 Kiefer, D. A., R. J. Olson, and O. Holm-Hansen (1976), Another look at the nitrite and chlorophyll maxima in the central  
881 North Pacific, *Deep-Sea Research and Oceanographic Abstracts*, 23(12), 1199–1208, doi:10.1016/0011-  
882 7471(76)90895-0.

883 Kimor, B., T. Berman, and A. Schneller (1987), Phytoplankton assemblages in the deep chlorophyll maximum layers off the  
884 Mediterranean coast of Israel, *Journal of Plankton Research*, 34(11), 433–443, doi:10.1016/0198-0254(87)90913-7.

885 Klausmeier, C. a., and E. Litchman (2001), Algal games: The vertical distribution of phytoplankton in poorly mixed water  
886 columns, *Limnology and Oceanography*, 46(8), 1998–2007, doi:10.4319/lo.2001.46.8.1998.

887 Krom, M. D., N. Kress, S. Brenner, and L. I. Gordon (1991), Phosphorus Limitation of Primary Productivity in the Eastern  
888 Mediterranean-Sea, *Limnology and Oceanography*, 36(3), 424–432, doi:10.4319/lo.1991.36.3.0424.

889 Krom, M. D., K. C. Emeis, and P. Van Cappellen (2010), Why is the Eastern Mediterranean phosphorus limited?, *Progress*  
890 *in Oceanography*, 85(3–4), 236–244, doi:10.1016/j.pocean.2010.03.003.

891 Lacour, L., M. Ardyna, K. F. Stec, H. Claustre, L. Prieur, A. Poteau, M. Ribera D’Alcala, and D. Iudicone (2017),  
892 Unexpected winter phytoplankton blooms in the North Atlantic subpolar gyre, *Nature Geoscience*, 10(11), 836–839,  
893 doi:10.1038/NGEO3035.

894 Latasa, M., A. Gutiérrez-rodríguez, A. M. Cabello, and R. Scharek (2016), Influence of light and nutrients on the vertical  
895 distribution of marine phytoplankton groups in the deep chlorophyll maximum, *Planet Ocean*, 80(S1), 57–62,  
896 doi:10.3989/scimar.04316.01A.

897 Lavigne, H., F. D’Ortenzio, C. Migon, H. Claustre, P. Testor, M. R. D’Alcalà, R. Lavezza, L. Houpert, and L. Prieur (2013),  
898 Enhancing the comprehension of mixed layer depth control on the Mediterranean phytoplankton phenology, *Journal of*  
899 *Geophysical Research: Oceans*, 118(7), 3416–3430, doi:10.1002/jgrc.20251.

900 Lavigne, H., F. D’Ortenzio, M. Ribera D’Alcalà, H. Claustre, R. Sauzède, and M. Gacic (2015), On the vertical distribution  
901 of the chlorophyll a concentration in the Mediterranean Sea: a basin scale and seasonal approach, *Biogeosciences*,  
902 12(5), 4139–4181, doi:10.5194/bg-12-4139-2015.

903 Leblanc, K. et al. (2018), Nanoplanktonic diatoms are globally overlooked but play a role in spring blooms and carbon  
904 export, *Nature Communications*, 9(1), 953, doi:10.1038/s41467-018-03376-9.

905 Letelier, R. M., D. M. Karl, M. R. Abbott, and R. R. Bidigare (2004), Light driven seasonal patterns of chlorophyll and  
906 nitrate in the lower euphotic zone of the North Pacific Subtropical Gyre, *Limnology and Oceanography*, 49(2), 508–  
907 519, doi:10.4319/lo.2004.49.2.0508.

908 Lewis, M. R., J. J. Cullen, and T. Platt (1983), Phytoplankton and thermal structure in the upper ocean: Consequences of  
909 nonuniformity in chlorophyll profile, *Journal of Geophysical Research: Oceans*, 88(C4), 2565–2570,  
910 doi:10.1029/JC088iC04p02565.

- 911 Li, Q. P., and D. A. Hansell (2016), Mechanisms controlling vertical variability of subsurface chlorophyll maxima in a mode-  
912 water eddy, *Journal of Marine Research*, 74(3), 175–199, doi:10.1357/002224016819594827.
- 913 Loisel, H., and A. Morel (1998), Light scattering and chlorophyll concentration in case 1 waters: A reexamination,  
914 *Limnology and Oceanography*, 43(5), 847–858, doi:10.4319/lo.1998.43.5.0847.
- 915 Longhurst, A. R., and W. Glen Harrison (1989), The biological pump: Profiles of plankton production and consumption in  
916 the upper ocean, *Progress in Oceanography*, 22(1), 47–123, doi:10.1016/0079-6611(89)90010-4.
- 917 Marty, J. C., J. Chiavérini, M. D. Pizay, and B. Avril (2002), Seasonal and interannual dynamics of nutrients and  
918 phytoplankton pigments in the western Mediterranean Sea at the DYFAMED time-series station (1991-1999), *Deep-  
919 Sea Research Part II: Topical Studies in Oceanography*, 49(11), 1965–1985, doi:10.1016/S0967-0645(02)00022-X.
- 920 Marty, J. C., N. Garcia, and P. Raimbault (2008), Phytoplankton dynamics and primary production under late summer  
921 conditions in the NW Mediterranean Sea, *Deep-Sea Research Part I: Oceanographic Research Papers*, 55(9), 1131–  
922 1149, doi:10.1016/j.dsr.2008.05.001.
- 923 Mayot, N., F. D’Ortenzio, J. Uitz, B. Gentili, J. Ras, V. Vellucci, M. Golbol, D. Antoine, and H. Claustre (2017a), Influence  
924 of the phytoplankton community structure on the spring and annual primary production in the Northwestern  
925 Mediterranean Sea, *Journal of Geophysical Research: Oceans*, 122, 1–17, doi:10.1002/2016JC012668.
- 926 Mayot, N., F. D’Ortenzio, V. Taillandier, L. Prieur, O. Pasqueron de Fommervault, H. Claustre, A. Bosse, P. Testor, and P.  
927 Conan (2017b), Physical and biogeochemical controls of the phytoplankton blooms in North-Western Mediterranean  
928 Sea: A multiplatform approach over a complete annual cycle (2012-2013 DEWEX experiment), *Journal of  
929 Geophysical Research: Oceans*, 122, doi:10.1002/2016JC012052.
- 930 Mignot, a., H. Claustre, F. D’Ortenzio, X. Xing, a. Poteau, and J. Ras (2011), From the shape of the vertical profile of in  
931 vivo fluorescence to Chlorophyll-*a* concentration, *Biogeosciences*, 8(8), 2391–2406, doi:10.5194/bg-8-2391-2011.
- 932 Mignot, A., H. Claustre, J. Uitz, A. Poteau, F. D’Ortenzio, and X. Xing (2014), Understanding the seasonal dynamics of  
933 phytoplankton biomass and the deep chlorophyll maximum in oligotrophic environments: A Bio-Argo float  
934 investigation, *Global Biogeochemical Cycles*, 28(8), 1–21, doi:10.1002/2013GB004781.
- 935 Mignot, A., R. Ferrari, and H. Claustre (2018), Floats with bio-optical sensors reveal what processes trigger the North  
936 Atlantic bloom, *Nature Communications*, 9(1), 190, doi:10.1038/s41467-017-02143-6.
- 937 Mikaelyan, A. S., and G. A. Belyaeva (1995), Chlorophyll “a” content in cells of Antarctic phytoplankton, *Polar Biology*,  
938 15(6), 437–445, doi:10.1007/BF00239721.
- 939 Millot, C. (1999), Circulation in the Western Mediterranean Sea, *Journal of Marine Systems*, 20(1–4), 423–442,  
940 doi:10.1016/S0924-7963(98)00078-5.

941 Moore, L. R., and S. W. Chisholm (1999), Photophysiology of the marine cyanobacterium *Prochlorococcus*: Ecotypic  
942 differences among cultured isolates, *Limnology and Oceanography*, 44(3), 628–638, doi:10.4319/lo.1999.44.3.0628.

943 Morel, A., and Y. Ahn (1991), Optics of heterotrophic nanoflagellates and ciliates: A tentative assessment of their scattering  
944 role in oceanic waters compared to those of bacterial and algal cells, *Journal of Marine Research*, 49(1), 177–202.

945 Morel, A., and J.-M. André (1991), Pigment distribution and Primary Production in the Western Mediterranean as Derived  
946 and Modeled From Coastal Zone Color Scanner Observations, *Journal of Geophysical Research*, 96(C7), 12685–  
947 12698, doi:10.1029/91JC00788.

948 Morel, A., and J.-F. Berthon (1989), Surface pigments, algal biomass profiles, and potential production of the euphotic layer:  
949 Relationships reinvestigated in view of remote-sensing applications, *Limnology and Oceanography*, 34(8), 1545–1562,  
950 doi:10.4319/lo.1989.34.8.1545.

951 Morel, A., and A. Bricaud (1986), Inherent optical properties of algal cells including picoplankton: theoretical and  
952 experimental results, *Canadian Bulletin of Fisheries and Aquatic Science*, 214, 521–559.

953 Morris, A. W., and J. P. Riley (1963), The determination of nitrate in sea water, *Analytica Chimica Acta*, 29, 272–279,  
954 doi:10.1016/S0003-2670(00)88614-6.

955 NREL (2000), SOLPOS 2.0 Documentation. Technical Report,

956 Organelli, E., H. Claustre, A. Bricaud, C. Schmechtig, A. Poteau, X. Xing, L. Prieur, F. D’Ortenzio, G. Dall’Olmo, and V.  
957 Vellucci (2016), A novel near real-time quality-control procedure for radiometric profiles measured by Bio-Argo  
958 floats: protocols and performances, *Journal of Atmospheric and Oceanic Technology*, 33, 937–951,  
959 doi:10.1175/JTECH-D-15-0193.1.

960 Organelli, E., H. Claustre, A. Bricaud, M. Barbieux, J. Uitz, F. D’Ortenzio, and G. Dall’Olmo (2017a), Bio-optical anomalies  
961 in the world’s oceans: An investigation on the diffuse attenuation coefficients for downward irradiance derived  
962 from Biogeochemical Argo float measurements, *Journal of Geophysical Research - Oceans*, 122, 2017–2033,  
963 doi:doi:10.1002/2016JC012629.

964 Organelli, E. et al. (2017b), Two databases derived from BGC-Argo float measurements for marine biogeochemical and bio-  
965 optical applications, *Earth System Science Data*, 9, 861–880, doi:https://doi.org/10.5194/essd-9-861-2017.

966 Parslow, J. S., P. W. Boyd, S. R. Rintoul, and F. B. Griffiths (2001), A persistent subsurface chlorophyll maximum in the  
967 Interpolar Frontal Zone south of Australia: Seasonal progression and implications for phytoplankton-light-nutrient  
968 interactions, *Journal of Geophysical Research: Oceans*, 106(C12), 31543–31557, doi:10.1029/2000JC000322.

969 Pasqueron de Fommervault, O. et al. (2015a), Seasonal variability of nutrient concentrations in the Mediterranean Sea:  
970 Contribution of Bio-Argo floats, *Journal of Geophysical Research: Oceans*, 120, 8528–8550,  
971 doi:doi:10.1002/2015JC011103.

- 972 Pasqueron de Fommervault, O., C. Migon, F. D'Ortenzio, M. Ribera d'Alcalà, and L. Coppola (2015b), Temporal variability  
973 of nutrient concentrations in the northwestern Mediterranean sea (DYFAMED time-series station), *Deep Sea Research*  
974 *Part I: Oceanographic Research Papers*, 100, 1–12, doi:10.1016/j.dsr.2015.02.006.
- 975 Pearson, K. (1901), On lines and planes of closest fit to systems of points in space, *Philosophical Magazine Series 6*, 2(11),  
976 559–572, doi:10.1080/14786440109462720.
- 977 Perez, V., E. Fernandez, E. Maranon, X. a. G. Moran, and M. V. Zubkov (2006), Vertical distribution of phytoplankton  
978 biomass, production and growth in the Atlantic subtropical gyres, *Deep Sea Res. I*, 53, 1616–1634,  
979 doi:10.1016/j.dsr.2006.07.008.
- 980 Pollehne, F., B. Klein, and B. Zeitzschel (1993), Low light adaptation and export production in the deep chlorophyll  
981 maximum layer in the northern Indian Ocean, *Deep Sea Research Part II: Topical Studies in Oceanography*, 40(3),  
982 737–752, doi:10.1016/0967-0645(93)90055-R.
- 983 Psarra, S., a. Tselepidis, and L. Ignatiades (2000), Primary productivity in the oligotrophic Cretan Sea (NE Mediterranean):  
984 seasonal and interannual variability, *Progress in Oceanography*, 46(2–4), 187–204, doi:10.1016/S0079-  
985 6611(00)00018-5.
- 986 Quéguiner, B., P. Tréguer, I. Peeken, and R. Scharek (1997), Biogeochemical dynamics and the silicon cycle in the Atlantic  
987 sector of the Southern Ocean during austral spring 1992, *Deep-Sea Research Part II: Topical Studies in*  
988 *Oceanography*, 44(1–2), 69–89, doi:10.1016/S0967-0645(96)00066-5.
- 989 Raimbault, P., B. Coste, M. Boulhadid, and B. Boudjellal (1993), Origin of high phytoplankton concentration in deep  
990 chlorophyll maximum (DCM) in a frontal region of the Southwestern Mediterranean Sea (algerian current), *Deep-Sea*  
991 *Research Part I*, 40(4), 791–804, doi:10.1016/0967-0637(93)90072-B.
- 992 Roesler, C. et al. (2017), Recommendations for obtaining unbiased chlorophyll estimates from in situ chlorophyll  
993 fluorometers: A global analysis of WET Labs ECO sensors, *Limnology and Oceanography: Methods*, 15(6), 572–585,  
994 doi:10.1002/lom3.10185.
- 995 Roesler, C. S., and A. H. Barnard (2013), Optical proxy for phytoplankton biomass in the absence of photophysiology:  
996 Rethinking the absorption line height, *Methods in Oceanography*, 7, 79–94, doi:10.1016/j.mio.2013.12.003.
- 997 Ryabov, A. B. (2012), Phytoplankton competition in deep biomass maximum, *Theoretical Ecology*, 5(3), 373–385,  
998 doi:10.1007/s12080-012-0158-0.
- 999 Sakamoto, C. M., K. S. Johnson, and L. J. Coletti (2009), Improved algorithm for the computation of nitrate concentrations in  
1000 seawater using an in situ ultraviolet spectrophotometer, *Limnology and Oceanography-Methods*, 7, 132–143,  
1001 doi:10.4319/lom.2009.7.132.
- 1002 Sakamoto, C. M., K. S. Johnson, L. J. Coletti, and H. W. Jannasch (2017), Pressure correction for the computation of nitrate

1003 concentrations in seawater using an in situ ultraviolet spectrophotometer, *Limnology and Oceanography: Methods*,  
1004 15(10), 897–902, doi:10.1002/lom3.10209.

1005 Sathyendranath, S., V. Stuart, A. Nair, K. Oka, T. Nakane, H. Bouman, M. H. Forget, H. Maass, and T. Platt (2009), Carbon-  
1006 to-chlorophyll ratio and growth rate of phytoplankton in the sea, *Marine Ecology Progress Series*, 383, 73–84,  
1007 doi:10.3354/meps07998.

1008 Schmechtig, C., A. Poteau, H. Claustre, F. D’Ortenzio, and E. Boss (2015), Processing Bio-Argo chlorophyll-a concentration  
1009 at the DAC Level, *Argo Data Management*, 1–22, doi:10.13155/39468.

1010 Schmechtig, C., V. Thierry, and The Bio-Argo Team (2016a), Argo Quality Control Manual for Biogeochemical Data, *Argo*  
1011 *Data Management*, 1–54, doi:10.13155/40879.

1012 Schmechtig, C., A. Poteau, H. Claustre, F. D’Ortenzio, G. Dall’Olmo, and E. Boss (2016b), Processing Bio-Argo particle  
1013 backscattering at the DAC level Version, *Argo Data Management*, 1–13, doi:doi:10.13155/39459.

1014 Severin, T. et al. (2017), Open-ocean convection process: a driver of the winter nutrient supply and the spring phytoplankton  
1015 distribution in the Northwestern Mediterranean Sea, *Journal of Geophysical Research*, doi:10.1002/2014JC010094.

1016 Siegel, D. A., S. Maritorena, N. B. Nelson, and M. J. Behrenfeld (2005), Independence and interdependencies among global  
1017 ocean color properties: Reassessing the bio-optical assumption, *Journal of Geophysical Research C: Oceans*, 110(7),  
1018 1–14, doi:10.1029/2004JC002527.

1019 Siokou-Frangou, I., U. Christaki, M. G. Mazzocchi, M. Montresor, M. Ribera d’Alcalá, D. Vaqué, and A. Zingone (2010),  
1020 Plankton in the open Mediterranean Sea: a review, *Biogeosciences*, 7(5), 1543–1586, doi:10.5194/bg-7-1543-2010.

1021 Stramski, D., and D. A. Kiefer (1991), Light scattering by microorganisms in the open ocean, *Progress in Oceanography*,  
1022 28(4), 343–383, doi:10.1016/0079-6611(91)90032-H.

1023 Stramski, D., R. A. Reynolds, M. Kahru, and B. G. Mitchell (1999), Estimation of Particulate Organic Carbon in the Ocean  
1024 from Satellite Remote Sensing, *Science*, 285(5425), 239–242.

1025 Stramski, D., A. Bricaud, and A. Morel (2001), Modeling the inherent optical properties of the ocean based on the detailed  
1026 composition of the planktonic community, *Applied Optics*, 40(18), 2929–2945, doi:10.1364/AO.40.002929.

1027 Stramski, D., E. Boss, D. Bogucki, and K. J. Voss (2004), The role of seawater constituents in light backscattering in the  
1028 ocean, *Progress in Oceanography*, 61(1), 27–56, doi:10.1016/j.pocean.2004.07.001.

1029 Taillandier, V. et al. (2017), Hydrography in the Mediterranean Sea during a cruise with RV Tethys 2 in May 2015, *Earth*  
1030 *System Science Data*, (November), 1–30, doi:10.17882/51678.

1031 Tanhua, T., D. Hainbucher, K. Schroeder, V. Cardin, M. Álvarez, and G. Civitarese (2013), The Mediterranean Sea system: a  
1032 review and an introduction to the special issue, *Ocean Science*, 9(5), 789–803, doi:10.5194/os-9-789-2013.



- 1033 Tripathy, S. C., S. Pavithran, P. Sabu, H. U. K. Pillai, D. R. G. Dessai, and N. Anilkumar (2015), Deep chlorophyll maximum  
1034 and primary productivity in Indian ocean sector of the southern ocean: Case study in the subtropical and polar front  
1035 during austral summer 2011, *Deep Sea Research Part II: Topical Studies in Oceanography*, 118, 240–249,  
1036 doi:10.1016/j.dsr2.2015.01.004.
- 1037 Uitz, J., H. Claustre, A. Morel, and S. B. Hooker (2006), Vertical distribution of phytoplankton communities in open ocean:  
1038 An assessment based on surface chlorophyll, *Journal of Geophysical Research*, 111(C8005), 1–23,  
1039 doi:10.1029/2005JC003207.
- 1040 Uitz, J., H. Claustre, F. B. Griffiths, J. Ras, N. Garcia, and V. Sandroni (2009), A phytoplankton class-specific primary  
1041 production model applied to the Kerguelen Islands region (Southern Ocean), *Deep Sea Research Part I:  
1042 Oceanographic Research Papers*, 56(4), 541–560, doi:10.1016/j.dsr.2008.11.006.
- 1043 Vaillancourt, R. D., C. W. Brown, R. R. L. Guillard, and W. M. Balch (2004), Light backscattering properties of marine  
1044 phytoplankton: relationships to cell size, chemical composition and taxonomy, *Journal of Plankton Research*, 26(2),  
1045 191–212, doi:10.1093/plankt/fbh012.
- 1046 Videau, C., A. Sournia, L. Prieur, and M. Fiala (1994), Phytoplankton and primary production characteristics at selected sites  
1047 in the geostrophic Almeria-Oran front system (SW Mediterranean Sea), *Journal of Marine Systems*, 5(3–5), 235–250,  
1048 doi:10.1016/0924-7963(94)90049-3.
- 1049 Westberry, T. K., P. Schultz, M. J. Behrenfeld, J. P. Dunne, M. R. Hiscock, S. Maritorea, J. L. Sarmiento, and D. A. Siegel  
1050 (2016), Annual cycles of phytoplankton biomass in the subarctic Atlantic and Pacific Ocean, *Global Biogeochemical  
1051 Cycles*, 30(2), 175–190, doi:10.1002/2015GB005276.
- 1052 Weston, K., L. Fernand, D. K. Mills, R. Delahunty, and J. Brown (2005), Primary production in the deep chlorophyll  
1053 maximum of the central North Sea, *Journal of Plankton Research*, 27(9), 909–922, doi:10.1093/plankt/fbi064.
- 1054 Whitmire, A. L., W. S. Pegau, L. Karp-Boss, E. Boss, and T. J. Cowles (2010), Spectral backscattering properties of marine  
1055 phytoplankton cultures, *Optics Express*, 18(14), 15073–15093, doi:10.1029/2003RG000148.D.
- 1056 Winn, C. D., L. Campbell, J. R. Christian, R. M. Letelier, D. V Hebel, J. E. Dore, L. Fujieki, and D. M. Karl (1995), Seasonal  
1057 variability in the phytoplankton community of the North Pacific Subtropical Gyre, *Global Biogeochemical Cycles*,  
1058 9(4), 605–620, doi:10.1029/95gb02149.
- 1059 Xing, X., A. Morel, H. Claustre, D. Antoine, F. D’Ortenzio, A. Poteau, and A. Mignot (2011), Combined processing and  
1060 mutual interpretation of radiometry and fluorimetry from autonomous profiling Bio-Argo floats: Chlorophyll a  
1061 retrieval, *Journal of Geophysical Research*, 116(C06020), 1–14, doi:10.1029/2010JC006899.
- 1062 Xing, X., H. Claustre, S. Blain, F. D’Ortenzio, D. Antoine, J. Ras, and C. Guinet (2012), Quenching correction for in vivo  
1063 chlorophyll fluorescence acquired by autonomous platforms: A case study with instrumented elephant seals in the

1064 Kerguelen region (Southern Ocean), *Limnology and Oceanography: Methods*, 10, 483–495,  
1065 doi:10.4319/lom.2012.10.483.

1066 Zielinski, O., D. Voß, B. Saworski, B. Fiedler, and A. Körtzinger (2011), Computation of nitrate concentrations in turbid  
1067 coastal waters using an in situ ultraviolet spectrophotometer, *Journal of Sea Research*, 65(4), 456–460,  
1068 doi:10.1016/j.seares.2011.04.002.

1069

1070

1071

1072

1073

1074

1075

1076

1077

1078

1079

1080

1081

1082

1083

1084

1085

1086

1087

1088

1089

1090

## Figure captions

1091

1092

1093 **Figure 1:** Geographic location of the multi-variable vertical profiles collected by the BGC-Argo  
1094 profiling floats in the Mediterranean Sea. The boundaries of the regions considered in this study are  
1095 indicated by the black rectangles. NW, SW and TYR correspond to the Western Basin regions  
1096 whereas ION and LEV represent the Eastern Basin regions. The red color indicates BGC-Argo floats  
1097 equipped with nitrate sensors. The black color indicates the specific BGC-Argo floats equipped with  
1098 nitrate sensors that are used in Figures 10 and 11.

1099 **Figure 2:** Comparison of the nitrate concentrations retrieved from the BGC-Argo floats to the  
1100 reference *in situ* measurements. The statistics (determination coefficient and slope) of the regression  
1101 analysis between float-derived and *in situ* data are also indicated.

1102 **Figure 3:** Boxplot of the distribution of the chlorophyll *a* concentration (Chl*a*) in the surface (a)  
1103 and SCM layers (b), the particulate backscattering coefficient ( $b_{bp}$ ) in the SCM layer (c), and the depth  
1104 (d) and thickness (e) of the SCM for each Mediterranean region considered in this study.

1105 **Figure 4:** Monthly median value of the chlorophyll *a* concentration, Chl*a* (in green) and of the  
1106 particulate backscattering coefficient,  $b_{bp}$  (in blue) in the SCM layer for the five Mediterranean regions  
1107 considered in this study. The annual median of Chl*a* ( $0.28 \text{ mg m}^{-3}$ ) and  $b_{bp}$  ( $5.8 \times 10^{-4} \text{ m}^{-1}$ ) calculated for  
1108 the SCM layer and over the entire Mediterranean Sea are indicated by the green and blue horizontal  
1109 lines, respectively. Note the different scales of the y-axes in panels a-e.

1110 **Figure 5:** Monthly median values of the depths of the Subsurface Chl*a* Maximum (in green),  
1111 the nitracline (in black), the Subsurface  $b_{bp}$  Maximum (in blue), the reference isolume (in yellow) and  
1112 the Mixed Layer (in dotted red) for the five Mediterranean regions. The depth of the nitracline is not  
1113 shown for the SW as there is no BGC-Argo float equipped with a nitrate sensor for this region.

1114 **Figure 6:** Boxplot of the distribution, for each of the Mediterranean regions considered in this  
1115 study, of the difference between the depths of the nitracline  $1 \mu\text{M}$  and of the isolume  $0.3 \text{ mol quanta}$   
1116  $\text{m}^{-2} \text{ d}^{-1}$  (a), of the daily PAR in the SCM layer (b), of the depth (c) and slope (d) of the nitracline, and

1117 the difference between the depths of the nitracline  $1 \mu\text{M}$  and of the Mixed Layer Depth (e). The SW is  
1118 not always represented, as there is no BGC-Argo float equipped with a nitrate sensor in this region.

1119 **Figure 7:** Normalized vertical profiles of the chlorophyll *a* concentration (Chl*a*) (a, c, e, g, and  
1120 i) and particulate backscattering coefficient ( $b_{\text{bp}}$ ) (b, d, f, h, and j) for each of the considered  
1121 Mediterranean regions. The Chl*a* and  $b_{\text{bp}}$  are normalized to their individual profile maximum value,  
1122  $\text{Chl}_{a\text{max}}$  and  $b_{\text{bpmax}}$ , respectively, while the depth is normalized to the euphotic depth ( $Z_{\text{eu}}$ ). The color  
1123 code indicates the different types of profiles, namely the different shapes are the “*bloom*”, “*mixed*”,  
1124 “*SBM*” (Subsurface Biomass Maximum) with a distinction between the “*SBM<sub>aZeu</sub>*” and the “*SBM<sub>bZeu</sub>*”  
1125 (for SBM occurring above or below the euphotic depth, respectively), and the “*SCM*” (Subsurface  
1126 Chlorophyll Maximum) with a distinction between the “*SCM<sub>aZeu</sub>*” and the “*SCM<sub>bZeu</sub>*” (for SCM  
1127 occurring or below the euphotic depth, respectively). The black dots indicate the position of the mean  
1128 Mixed Layer Depth (MLD) for each type of profile.

1129 **Figure 8:** Monthly occurrence of the different types of profile shapes for each of the five  
1130 considered Mediterranean regions. The color code indicates the type of profile shape, namely “*bloom*”,  
1131 “*mixed*”, “*SBM*” (Subsurface Biomass Maximum) with a distinction between the “*SBM<sub>aZeu</sub>*” and the  
1132 “*SBM<sub>bZeu</sub>*” (for SBM occurring above or below the euphotic depth, respectively), and the “*SCM*”  
1133 (Subsurface Chlorophyll Maximum) with a distinction between the “*SCM<sub>aZeu</sub>*” and the “*SCM<sub>bZeu</sub>*” (for  
1134 SCM occurring or below the euphotic depth, respectively).

1135 **Figure 9:** Normalized vertical profiles of the chlorophyll *a* concentration (Chl*a*) (a,c,e, and g)  
1136 and particulate backscattering coefficient ( $b_{\text{bp}}$ ) (b,d,f, and h) for each shape type. The Chl*a* and  $b_{\text{bp}}$  are  
1137 normalized to their individual profile maximum value,  $\text{Chl}_{a\text{max}}$  and  $b_{\text{bpmax}}$ , respectively, while the  
1138 depth is normalized to the euphotic depth ( $Z_{\text{eu}}$ ). The color code and the type of lines indicate the  
1139 region of the Mediterranean Sea and the different shapes, respectively. The different shapes are the  
1140 “*bloom*”, “*mixed*”, “*SBM*” (Subsurface Biomass Maximum) with a distinction between the “*SBM<sub>aZeu</sub>*”  
1141 and the “*SBM<sub>bZeu</sub>*” (for SBM occurring above or below the euphotic depth, respectively), and the  
1142 “*SCM*” (Subsurface Chlorophyll Maximum) with a distinction between the “*SCM<sub>aZeu</sub>*” and the

1143 “ $SCM_{bZeu}$ ” (for SCM occurring or below the euphotic depth, respectively). Note the different scales of  
1144 the x-axes.

1145 **Figure 10:** Trajectory and Chl*a* time series of the float deployed in the Gulf of Lions (fGL; a-b)  
1146 and of the float deployed in the Levantine Sea (fLS; c-d). On panels b and d, the white line shows the  
1147 isolume  $0.3 \text{ mol quanta m}^{-2} \text{ d}^{-1}$ , the blue line indicates the Mixed Layer Depth (MLD) and the black  
1148 line the nitracline  $1 \mu\text{M}$ .

1149 **Figure 11:** Nutrient versus light resource-limitation diagram for the two BGC-Argo floats  
1150 deployed in the Gulf of Lions (a) and Levantine Sea (b). The color of the data points indicates the  
1151 Chl*a*-to- $b_{bp}$  ratio values. The x- and y-axes respectively represent the PAR and  $[\text{NO}_3^-]$  values  
1152 normalized to the maximum value calculated over the float lifetime in the layer extending from the  
1153 surface to below the SCM. Note that the plots show only data collected within the SCM layer, thus  
1154 corresponding to low normalized PAR values (i.e. under 25% of the maximum PAR).

1155 **Figure 12:** Schematic representation of the different situations of SCMs in the Mediterranean  
1156 Sea during the oligotrophic summer period for the five considered regions of the Mediterranean Sea  
1157 along the west-to-east gradient.

1158

1159

1160

1161

1162

1163

1164

1165

1166

1167

1168

1169

1170 **Table 1:** Regions with the corresponding abbreviation and number of available floats

1171 and profiles represented in the Mediterranean BGC-Argo database used in the present study

1172

| Region                         | Basin   | Abbreviation | Number of profiles | Number of floats |
|--------------------------------|---------|--------------|--------------------|------------------|
| Gulf of Lions and Ligurian Sea | Western | NW           | 980                | 11               |
| Algero-provencal Basin         | Western | SW           | 540                | 5                |
| Tyrrhenian Sea                 | Western | TYR          | 553                | 5                |
| Ionian Sea                     | Eastern | ION          | 936                | 8                |
| Levantine Sea                  | Eastern | LEV          | 1041               | 7                |
| Total                          | 2       | 5            | 4050               | 36               |

1173

1174

1175

1176

1177

1178

1179

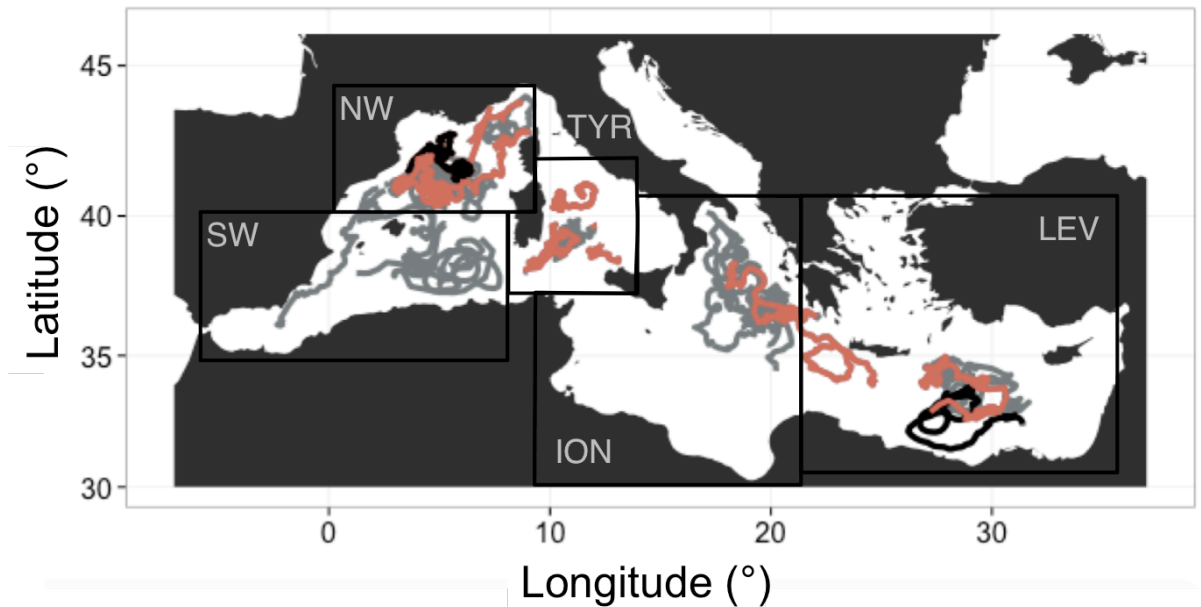

1180

1181 **Figure 1:** Geographic location of the multi-variable vertical profiles collected by the BGC-  
1182 Argo profiling floats in the Mediterranean Sea. The boundaries of the regions considered in this study  
1183 are indicated by the black rectangles. NW, SW and TYR correspond to the Western Basin regions  
1184 whereas ION and LEV represent the Eastern Basin regions. The red color indicates BGC-Argo floats  
1185 equipped with nitrate sensors. The black color indicates the specific BGC-Argo floats equipped with  
1186 nitrate sensors that are used in Figures 10 and 11.

1187

1188

1189

1190

1191

1192

1193  
1194  
1195  
1196  
1197  
1198  
1199  
1200  
1201  
1202  
1203  
1204  
1205  
1206  
1207  
1208  
1209  
1210  
1211  
1212  
1213  
1214  
1215  
1216

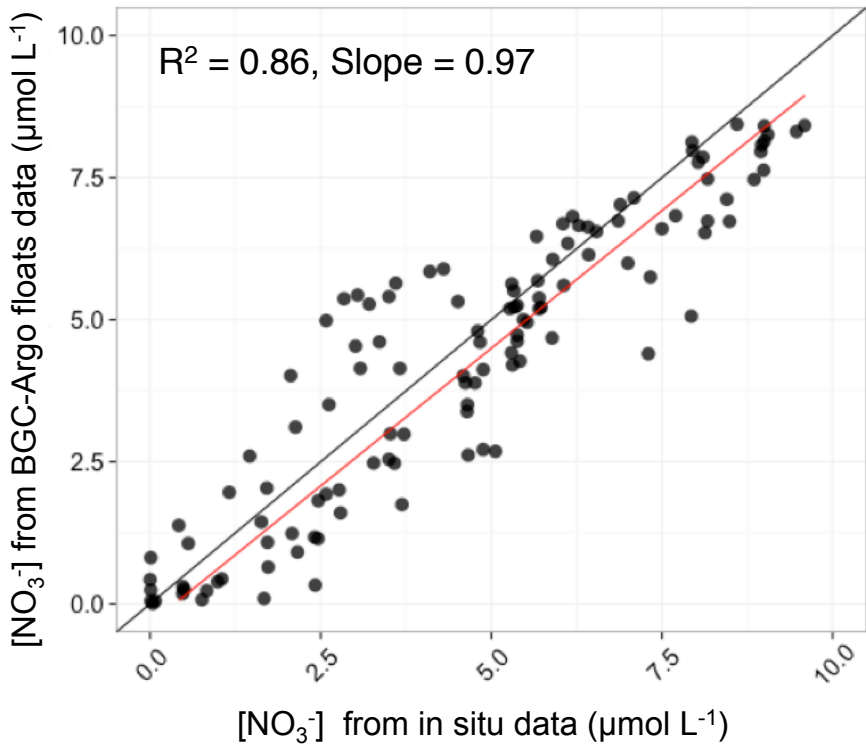

**Figure 2:** Comparison of the nitrate concentrations retrieved from the BGC-Argo floats to the reference *in situ* measurements. The statistics (determination coefficient and slope) of the regression analysis between float-derived and *in situ* data are also indicated.



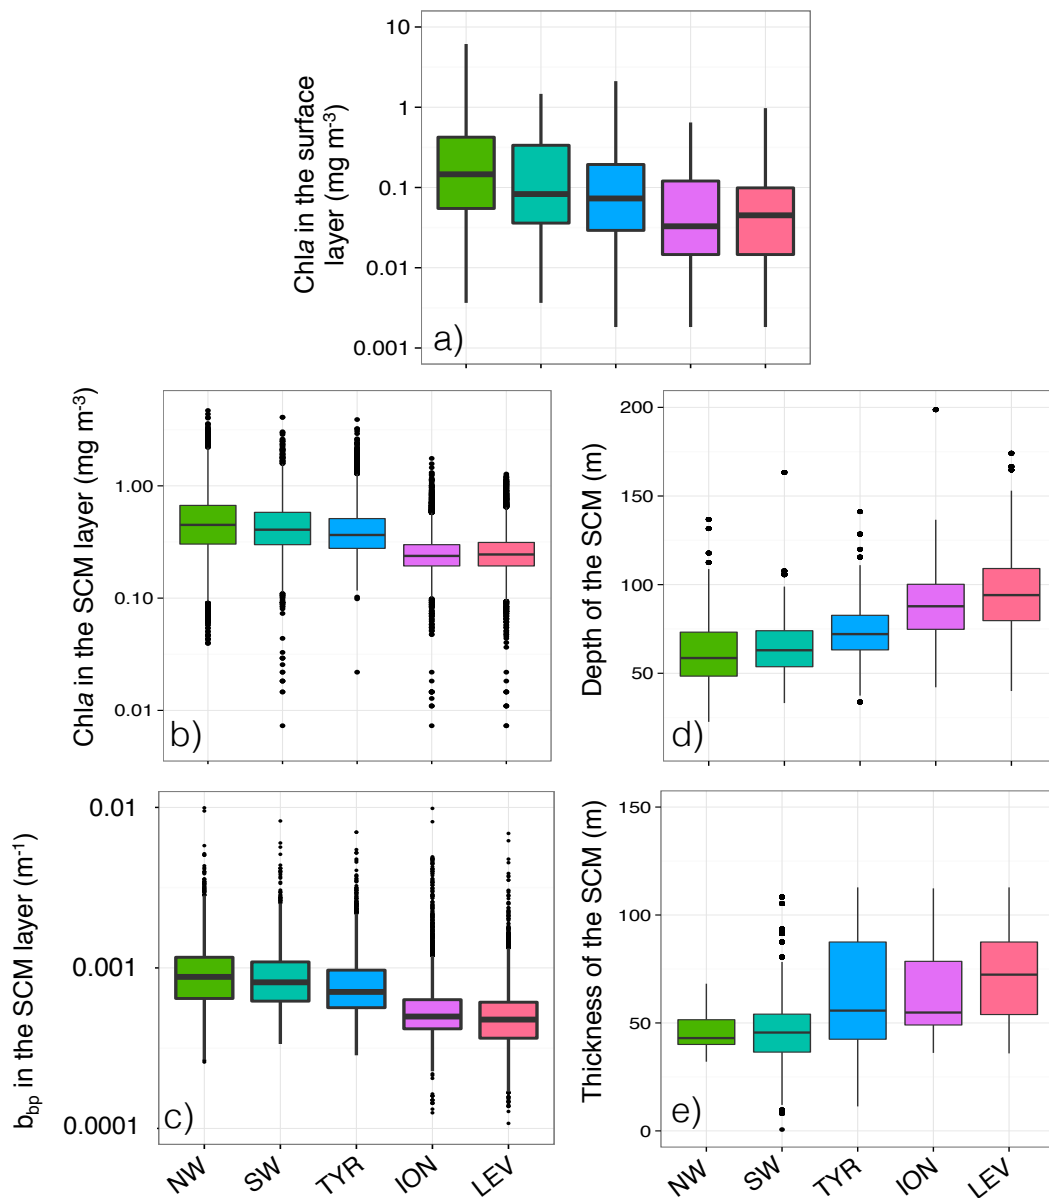

1218

1219 **Figure 3:** Boxplot of the distribution of the chlorophyll *a* concentration (Chla) in the surface

1220 (a) and SCM layers (b), the particulate backscattering coefficient ( $b_{bp}$ ) in the SCM layer (c), and the

1221 depth (d) and thickness (e) of the SCM for each Mediterranean region considered in this study.

1222

1223

1224

1225

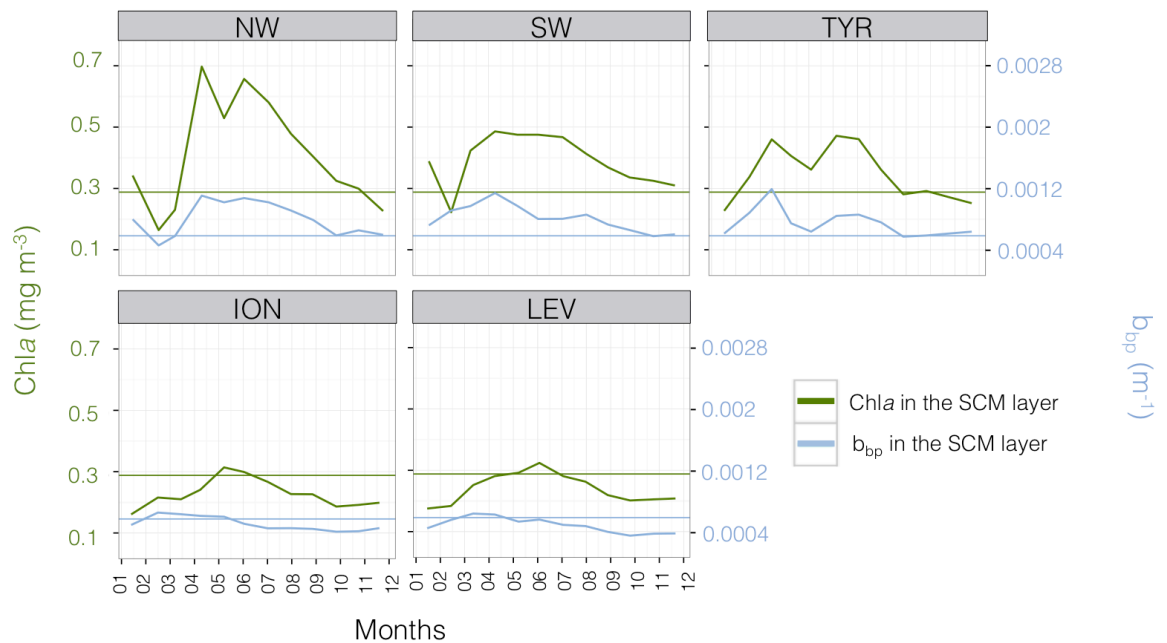

1226

1227 **Figure 4:** Monthly median value of the chlorophyll *a* concentration, Chla (in green) and of the  
1228 particulate backscattering coefficient,  $b_{bp}$  (in blue) in the SCM layer for the five Mediterranean regions  
1229 considered in this study. The annual median of Chla ( $0.28 \text{ mg m}^{-3}$ ) and  $b_{bp}$  ( $5.8 \times 10^{-4} \text{ m}^{-1}$ ) calculated for  
1230 the SCM layer and over the entire Mediterranean Sea are indicated by the green and blue horizontal  
1231 lines, respectively. Note the different scales of the y-axes in panels a-e.

1232

1233

1234

1235

1236

1237

1238

1239

1240

1241

1242

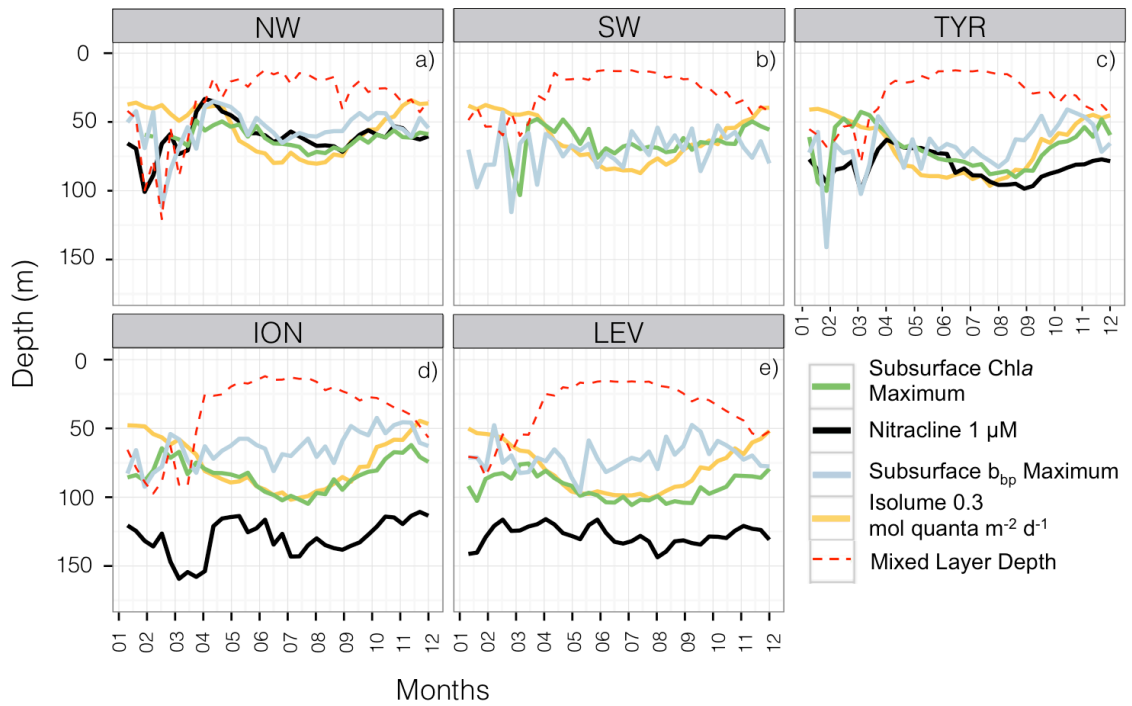

1243

1244 **Figure 5:** Monthly median values of the depths of the Subsurface Chla Maximum (in green),  
1245 the nitracline (in black), the Subsurface  $b_{bp}$  Maximum (in blue), the reference isolume (in yellow) and  
1246 the Mixed Layer (in dotted red) for the five Mediterranean regions. The depth of the nitracline is not  
1247 shown for the SW as there is no BGC-Argo float equipped with a nitrate sensor for this region.

1248

1249

1250

1251

1252

1253

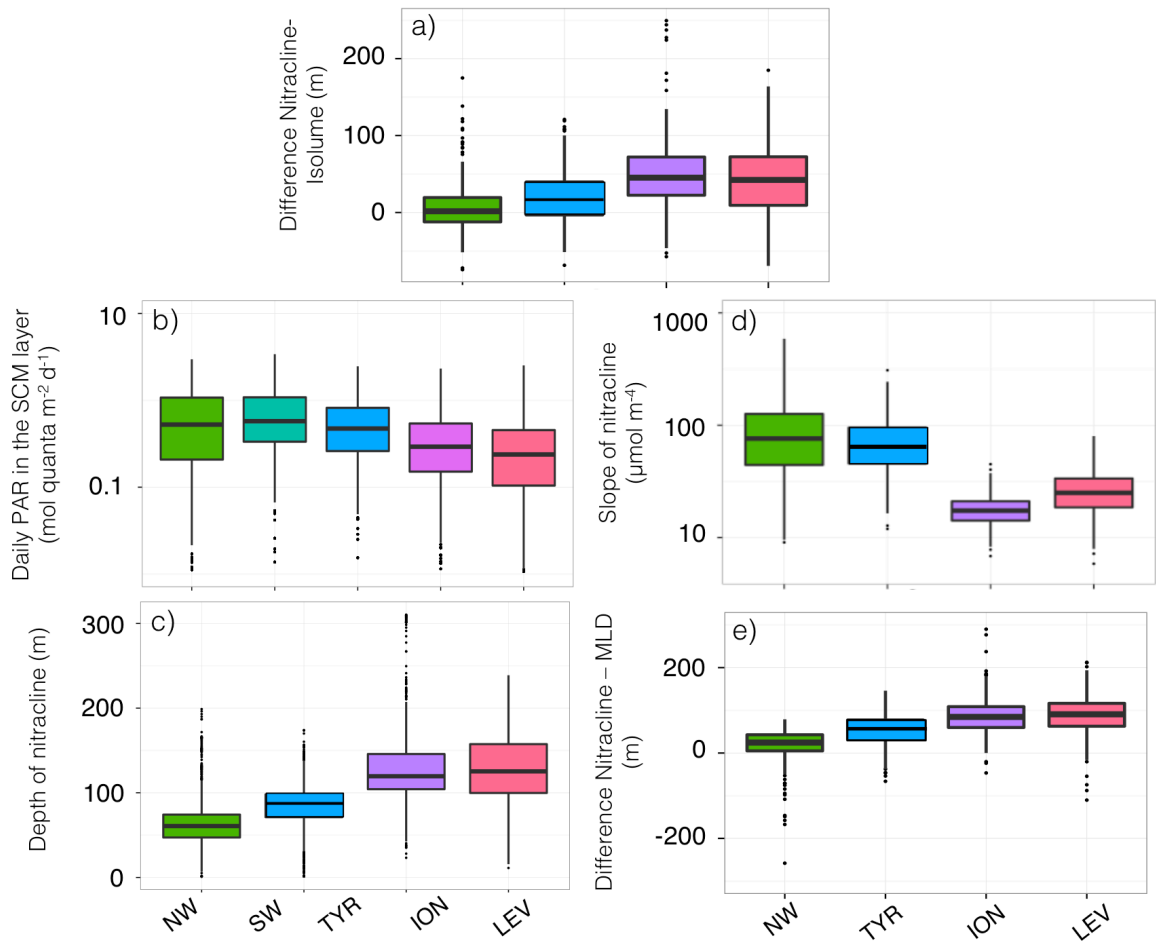

1255

1256

**Figure 6:** Boxplot of the distribution, for each of the Mediterranean regions considered in this

1257

study, of the difference between the depths of the nitracline 1  $\mu\text{M}$  and of the isolume 0.3 mol quanta

1258

$\text{m}^{-2} \text{d}^{-1}$  (a), of the daily PAR in the SCM layer (b), of the depth (c) and slope (d) of the nitracline, and

1259

the difference between the depths of the nitracline 1  $\mu\text{M}$  and of the Mixed Layer Depth (e). The SW is

1260

not always represented, as there is no BGC-Argo float equipped with a nitrate sensor in this region.

1261

1262

1263

1264

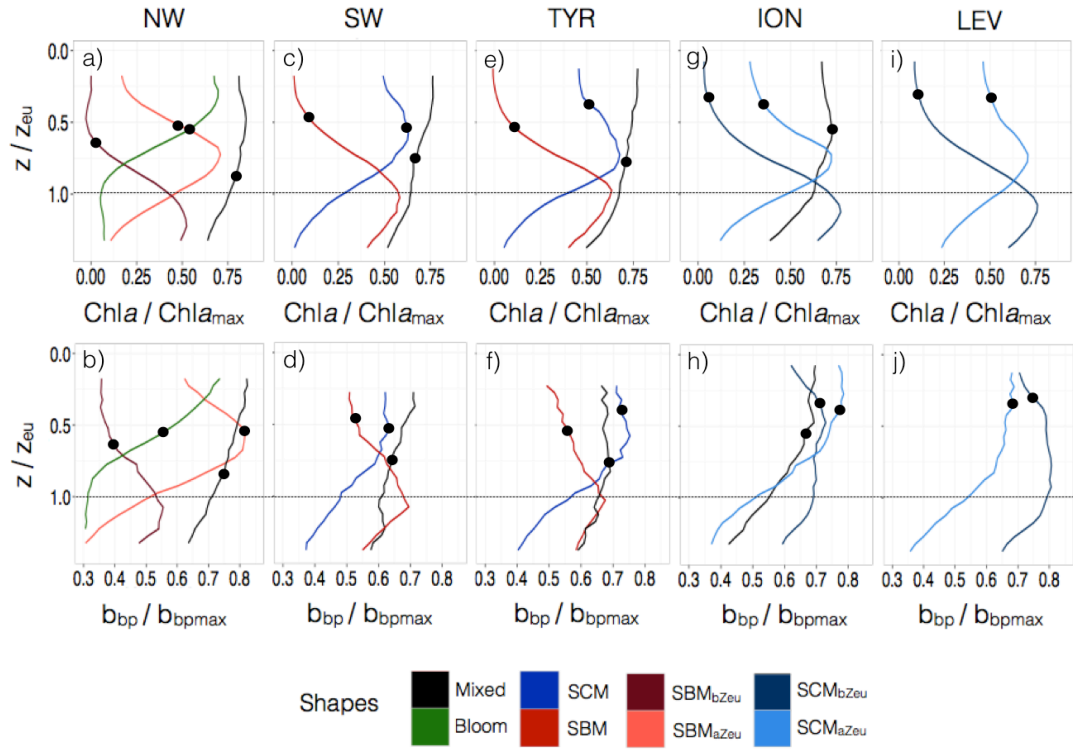

1265

1266 **Figure 7:** Normalized vertical profiles of the chlorophyll *a* concentration (Chla) (a, c, e, g, and  
 1267 i) and particulate backscattering coefficient ( $b_{bp}$ ) (b, d, f, h, and j) for each of the considered  
 1268 Mediterranean regions. The Chla and  $b_{bp}$  are normalized to their individual profile maximum value,  
 1269  $Chla_{max}$  and  $b_{bpmax}$ , respectively, while the depth is normalized to the euphotic depth ( $Z_{eu}$ ). The color  
 1270 code indicates the different types of profiles, namely the different shapes are the “bloom”, “mixed”,  
 1271 “SBM” (Subsurface Biomass Maximum) with a distinction between the “ $SBM_{aZeU}$ ” and the “ $SBM_{bZeU}$ ”  
 1272 (for SBM occurring above or below the euphotic depth, respectively), and the “SCM” (Subsurface  
 1273 Chlorophyll Maximum) with a distinction between the “ $SCM_{aZeU}$ ” and the “ $SCM_{bZeU}$ ” (for SCM  
 1274 occurring or below the euphotic depth, respectively). The black dots indicate the position of the mean  
 1275 Mixed Layer Depth (MLD) for each type of profile.

1276

1277

1278

1279

1280

1281

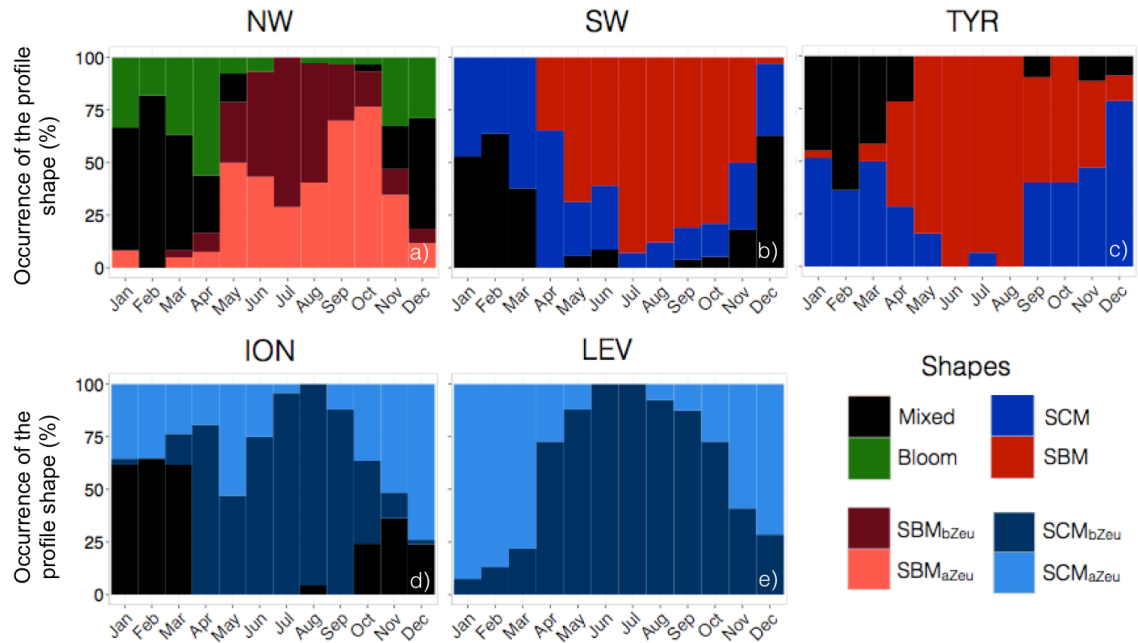

1282

1283 **Figure 8:** Monthly occurrence of the different types of profile shapes for each of the five  
1284 considered Mediterranean regions. The color code indicates the type of profile shape, namely “*bloom*”,  
1285 “*mixed*”, “*SBM*” (Subsurface Biomass Maximum) with a distinction between the “*SBM<sub>aZeu</sub>*” and the  
1286 “*SBM<sub>bZeu</sub>*” (for SBM occurring above or below the euphotic depth, respectively), and the “*SCM*”  
1287 (Subsurface Chlorophyll Maximum) with a distinction between the “*SCM<sub>aZeu</sub>*” and the “*SCM<sub>bZeu</sub>*” (for  
1288 SCM occurring or below the euphotic depth, respectively).

1289

1290

1291

1292

1293

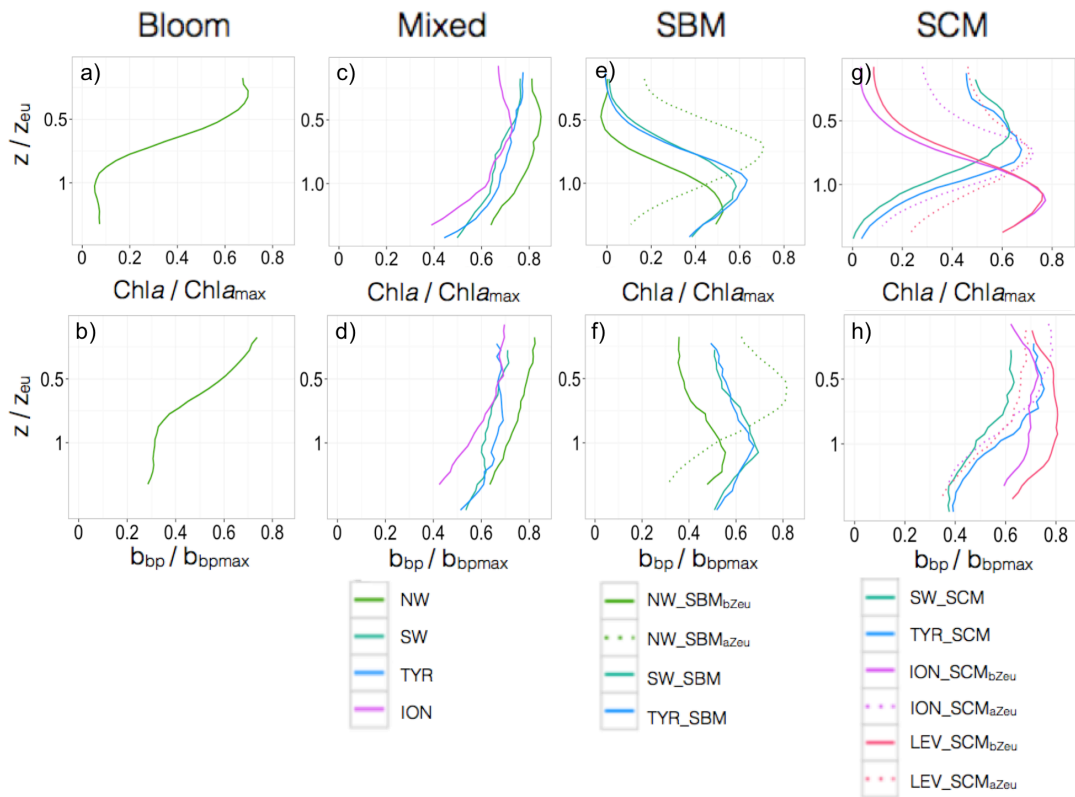

1295

1296

**Figure 9:** Normalized vertical profiles of the chlorophyll *a* concentration (Chla) (a,c,e, and g)

1297

and particulate backscattering coefficient ( $b_{bp}$ ) (b,d,f, and h) for each shape type. The Chla and  $b_{bp}$  are

1298

normalized to their individual profile maximum value,  $Chla_{max}$  and  $b_{bpmax}$ , respectively, while the

1299

depth is normalized to the euphotic depth ( $Z_{eu}$ ). The color code and the type of lines indicate the

1300

region of the Mediterranean Sea and the different shapes, respectively. The different shapes are the

1301

“*bloom*”, “*mixed*”, “*SBM*” (Subsurface Biomass Maximum) with a distinction between the “*SBM<sub>aZeU</sub>*”

1302

and the “*SBM<sub>bZeU</sub>*” (for SBM occurring above or below the euphotic depth, respectively), and the

1303

“*SCM*” (Subsurface Chlorophyll Maximum) with a distinction between the “*SCM<sub>aZeU</sub>*” and the

1304

“*SCM<sub>bZeU</sub>*” (for SCM occurring or below the euphotic depth, respectively). Note the different scales of

1305

the x-axes.

1306

1307

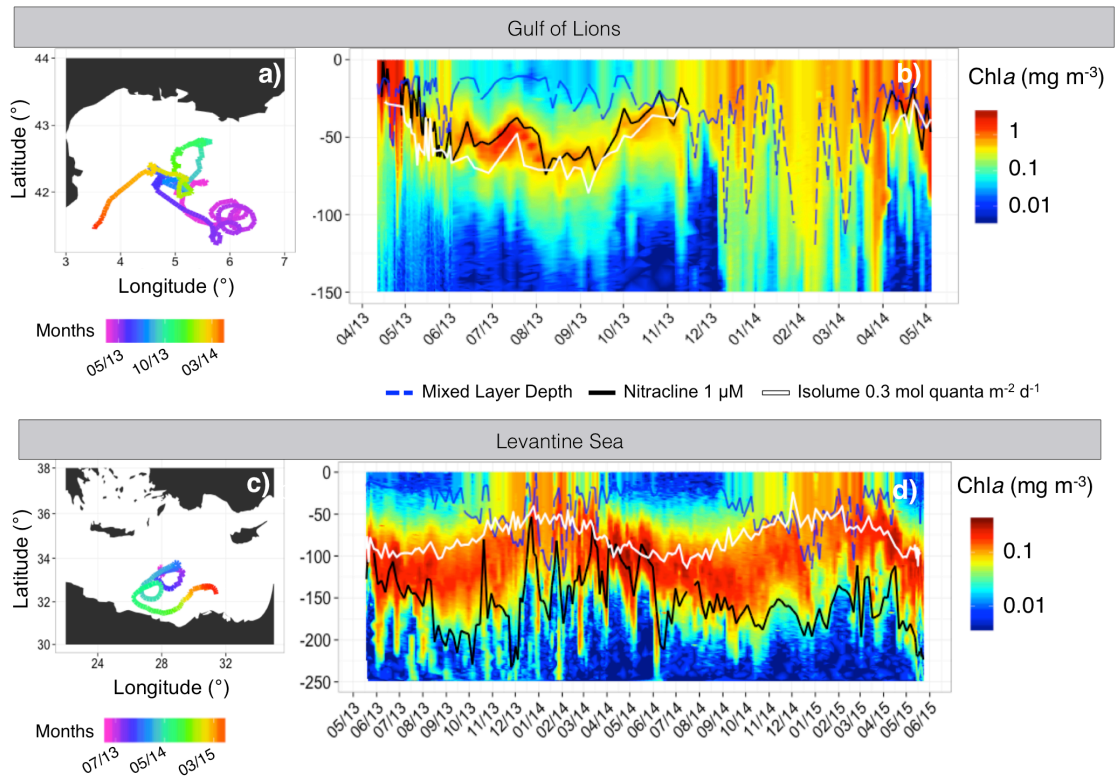

1309

1310 **Figure 10:** Trajectory and Chl *a* time series of the float deployed in the Gulf of Lions (fGL; a-  
 1311 b) and of the float deployed in the Levantine Sea (fLS; c-d). On panels b and d, the white line shows  
 1312 the isolume 0.3 mol quanta m<sup>-2</sup> d<sup>-1</sup>, the blue line indicates the Mixed Layer Depth (MLD) and the  
 1313 black line the nitracline 1 μM.

1314

1315

1316

1317

1318

1319

1320

1321



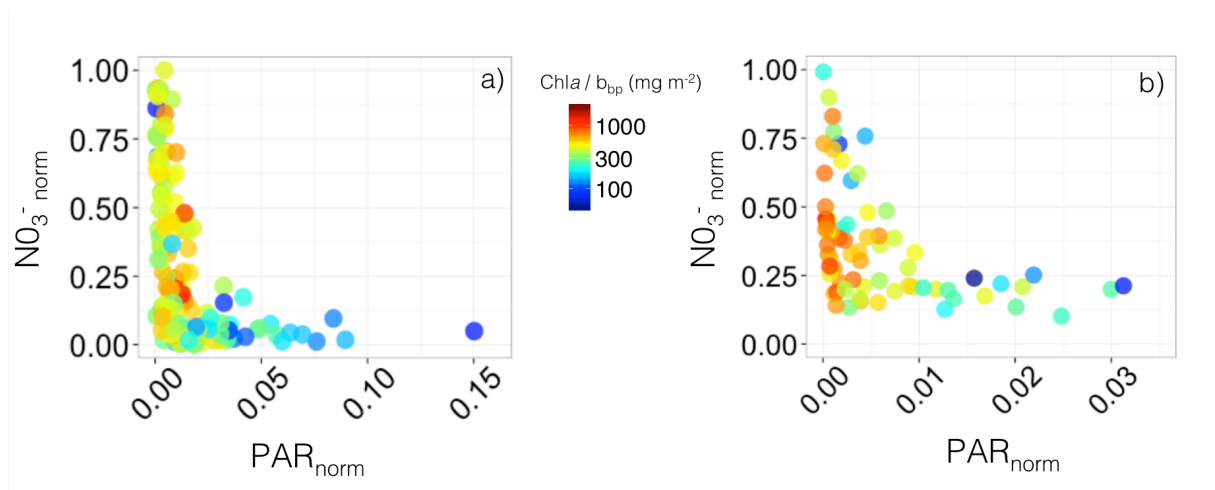

1322

1323

**Figure 11:** Nutrient versus light resource-limitation diagram for the two BGC-Argo floats

1324

deployed in the Gulf of Lions (a) and Levantine Sea (b). The color of the data points indicates the

1325

Chla-to- $b_{bp}$  ratio values. The x- and y-axes respectively represent the PAR and  $[NO_3^-]$  values

1326

normalized to the maximum value calculated over the float lifetime in the layer extending from the

1327

surface to below the SCM. Note that the plots show only data collected within the SCM layer, thus

1328

corresponding to low normalized PAR values (i.e. under 25% of the maximum PAR).

1329

1330

1331

1332

1333

1334

1335

1336

1337

1338

1339

1340

1341

1342

1343

1344

1345  
1346  
1347  
1348

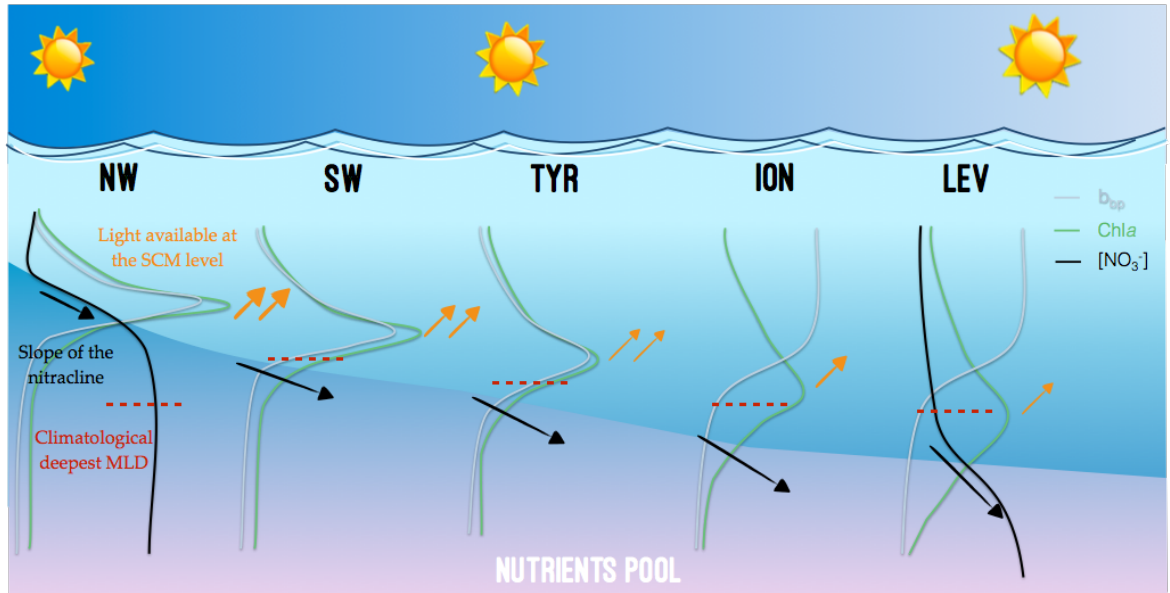

1349  
1350

1351 **Figure 12:** Schematic representation of the different situations of SCMs in the Mediterranean  
1352 Sea during the oligotrophic summer period for the five considered regions of the Mediterranean Sea  
1353 along the west-to-east gradient.

1354  
1355
